1           **Metabolic basis for the evolution of a common pathogenic *Pseudomonas***  
2                                                                   ***aeruginosa* variant**

3           Dallas L. Mould<sup>1</sup>, Mirjana Stevanovic<sup>1</sup>, Alix Ashare<sup>1,2</sup>, Daniel Schultz<sup>1</sup>, and Deborah A  
4                                                                   Hogan<sup>1#</sup>

5           <sup>1</sup>Department of Microbiology and Immunology, Geisel School of Medicine at Dartmouth,  
6                                                                   Hanover, NH USA

7           <sup>2</sup>Department of Medicine, Dartmouth-Hitchcock Medical Center, Lebanon, NH, USA.

8  
9           Running Title: CbrAB activity promotes rise of LasR<sup>-</sup> strains

10          Key Words: CbrB, carbon catabolite repression, LasR, quorum sensing, experimental  
11          evolution, social cheating, Crc, Hfq, *Pseudomonas aeruginosa*

12  
13  
14  
15  
16          #To whom correspondence should be addressed:

17          Department of Microbiology and Immunology  
18          Geisel School of Medicine at Dartmouth  
19          Rm 208 Vail Building, Hanover, NH 03755  
20          E-mail: [dhogan@dartmouth.edu](mailto:dhogan@dartmouth.edu)

21          Tel: (603) 650-1252

22          **Abstract:** 247 words

23          **Text:** 5083 words

## 24 **Abstract**

25 Microbes frequently evolve in reproducible ways. Here, we show that differences in  
26 specific metabolic regulation explain the frequent presence of *lasR* loss-of-function  
27 mutations in the bacterial pathogen *Pseudomonas aeruginosa*. While LasR contributes  
28 to virulence, *lasR* mutants have been associated with more severe disease. A model  
29 based on the intrinsic growth kinetics for a wild type strain and its LasR<sup>-</sup> derivative, in  
30 combination with an experimental evolution based genetic screen and further genetics  
31 analyses, indicated that differences in metabolism were sufficient to explain the rise of  
32 these common mutant types. The evolution of LasR<sup>-</sup> lineages in laboratory and clinical  
33 isolates depended on activity of the two-component system CbrAB, which modulates  
34 substrate prioritization through the catabolite repression control pathway. LasR<sup>-</sup>  
35 lineages frequently arise in cystic fibrosis lung infections and their detection correlates  
36 with disease severity. Our analysis of bronchoalveolar lavage fluid metabolomes  
37 identified compounds that negatively correlate with lung function, and we show that  
38 these compounds support enhanced growth of LasR<sup>-</sup> cells in a CbrB-controlled  
39 manner. We propose that *in vivo* metabolomes are a major driver of pathogen evolution,  
40 which may influence the progression of disease and its treatment.

41

## 42 **Introduction**

43 Quorum sensing (QS) is a mechanism of microbial communication that regulates  
44 the expression of a suite of genes in response to diffusible autoinducers in a population  
45 (Schuster & Greenberg, 2007; Schuster, Lostroh, Ogi, & Greenberg, 2003). Despite the  
46 importance of cell-cell communication for virulence (Rumbaugh et al., 2009) and high

47 conservation across divergent phylogenies, key QS regulators in diverse species, such  
48 as *Pseudomonas aeruginosa*, *Vibrio cholerae*, and *Staphylococcus aureus*, frequently  
49 lose function (Dallas L. Mould & Hogan, 2021), due to recent missense and nonsense  
50 mutations, indels, or genome rearrangements. These paradoxical findings suggest that  
51 there may be connections between QS and other key physiological pathways that have  
52 yet to be revealed.

53 In *P. aeruginosa*, many isolates from humans, plants, and water sources have  
54 loss-of-function mutations in the gene encoding the transcription factor LasR (Groleau,  
55 Taillefer, Vincent, Constant, & Déziel; O'Connor, Zhao, & Diggle, 2021; Schuster et al.,  
56 2003), which is central to an interconnected QS network (Schuster et al., 2003). LasR<sup>-</sup>  
57 isolates have been repeatedly observed in *P. aeruginosa* lung infections in people with  
58 cystic fibrosis (pwCF) (Smith et al., 2006), and LasR<sup>-</sup> isolate detection is associated  
59 with more rapid lung function decline and more inflammation than in comparator  
60 populations (Hoffman et al., 2009; LaFayette et al., 2015). In a clinical study of acute  
61 corneal infections (Hammond et al., 2016), LasR<sup>-</sup> strains also correlated with more  
62 damage and worse outcomes.

63 Multiple studies contribute to our understanding of the physiologies and social  
64 interactions that impact *lasR* loss-of-function mutant fitness. Several studies provide  
65 evidence in support of the model that LasR<sup>-</sup> strains are “social cheaters” that reap the  
66 benefits of shared goods secreted by neighboring wild-type cells without incurring the  
67 metabolic costs (Sandoz, Mitzimberg, & Schuster, 2007). In this case, LasR<sup>-</sup> strains  
68 grow better when the wild type is in the majority, and crash when a critical threshold of  
69 LasR<sup>-</sup> cells is surpassed (West, Griffin, Gardner, & Diggle, 2006). The extent of *lasR*

70 mutant “cheating” depends on the cost-benefit difference, and multiple shared goods,  
71 including siderophores, must be considered (Özkaya, Balbontín, Gordo, & Xavier,  
72 2018). To combat the rise of cheaters, *P. aeruginosa* produces products such as  
73 hydrogen cyanide, rhamnolipids, or pyocyanin that inhibit growth of quorum sensing  
74 mutants through a process known as “policing” (Castañeda-Tamez et al., 2018; Rodolfo  
75 García-Contreras et al., 2020; M. Wang, Schaefer, Dandekar, & Greenberg, 2015).  
76 There is evidence that the presence of LasR<sup>-</sup> subpopulations may be beneficial (R.  
77 García-Contreras & Loarca, 2020) and lead to emergent properties including  
78 metabolite-driven interactions between wild type and *lasR* mutants that provoke the  
79 production of QS-controlled factors by the *lasR* mutant to levels greater than in wild-type  
80 monocultures (D. L. Mould, Botelho, & Hogan, 2020). In addition to the interactions  
81 between LasR<sup>+</sup> and LasR<sup>-</sup> cells that influence the fitness and behavior of LasR<sup>-</sup> strains  
82 described above, there are important intrinsic characteristics of LasR<sup>-</sup> strains including  
83 increased Anr-regulated microoxic fitness (Clay et al., 2020), resistance to alkaline pH  
84 in aerobic conditions (Heurlier et al., 2005), and altered metabolism (D'Argenio, Wu,  
85 Hoffman, Kulasekara, Déziel, et al., 2007). The metabolic advantages associated with  
86 LasR<sup>-</sup> strains include growth on individual amino acids (D'Argenio, Wu, Hoffman,  
87 Kulasekara, Déziel, et al., 2007). The numerous differences described between LasR<sup>+</sup>  
88 and LasR<sup>-</sup> strains indicate that an understanding of the factors that drive the rise and  
89 persistence of *lasR* mutants may be complex and are not yet well understood.

90 Here, we use mathematical modeling, experimental evolution-based genetic  
91 screens, phenotype profiling, and whole-genome sequencing of evolved communities in  
92 different backgrounds to understand the rise of LasR<sup>-</sup> strains over only a few serial

93 passages. We identified the CbrAB pathway as the strongest contributor to the rise of  
94 *lasR* loss-of-function mutants, and our findings were not specific to strain background or  
95 medium. LasR<sup>-</sup> strains are more commonly detected in samples from individuals with  
96 more severe CF lung disease (Smith et al., 2006). Analysis of bronchoalveolar lavage  
97 samples from pwCF and non-CF comparators identified several compounds that were  
98 higher in pwCF and that inversely correlated with lung function. LasR<sup>-</sup> strains showed  
99 improved growth on the majority of these compounds, many of which were amino acids,  
100 and epistasis analysis confirmed that the improved growth was due to altered activity of  
101 the CbrB-CrcZ-Crc pathway.

102

## 103 **Results**

### 104 **Mathematical model built from monoculture growth data predicts the observed** 105 **rise of *lasR* loss-of-function mutants.**

106 Our previous work on microbial interactions involving LasR<sup>+</sup> and LasR<sup>-</sup> *P.*  
107 *aeruginosa* revealed subtle differences in growth kinetics (D. L. Mould et al., 2020). In  
108 monoculture, *P. aeruginosa* strain PA14  $\Delta lasR$  had no lag phase while the wild type had  
109 a lag phase of 1 h (**Fig. 1** for summary data and **Fig. S1** for growth curve). Furthermore,  
110 consistent with work by others (Diggle, Griffin, Campbell, & West, 2007; Rodolfo García-  
111 Contreras et al., 2020), the  $\Delta lasR$  strain had a 16% lower growth rate but a 1.5-fold  
112 higher yield in LB. We found no differences in death rate resulting from elevated culture  
113 pH (as has previously been reported in low oxygen conditions (Heurlier et al., 2005)) or  
114 the onset of death phase relative to PA14 wild type under these conditions (**Fig. S1**).

115           To determine if inherent differences in growth kinetics were sufficient to explain  
116 the rise of spontaneous LasR<sup>-</sup> lineages, we built a mathematical model of strain  
117 competition based exclusively on experimentally-determined mono-culture growth  
118 parameters that predicted the relative changes in wild type and LasR<sup>-</sup> cells grown on a  
119 common pool of growth substrates (**Fig. 1A**). We modeled cell density (**Fig. 1A**-left y-  
120 axis) and the percentage of LasR<sup>-</sup> cells (**Fig. 1A**-right y-axis) assuming a shared  
121 nutrient source and passage every 48 hours which is a regime used previously to study  
122 the selection for LasR<sup>-</sup> cells (Heurlier et al., 2005). Based on the mutation frequency of  
123 *P. aeruginosa* strain PA14 ( $0.52 \times 10^{-3}$  per genome per generation) (Dettman,  
124 Sztepanacz, & Kassen, 2016) and the size of the *lasR* gene (720 bp) relative to the  
125 genome (~6 Mbp), we approximate 50 *lasR* alleles with nucleotide changes would be  
126 present in a dense culture (~  $10^8$  cells), a fraction of which would lead to a LasR<sup>-</sup>  
127 phenotype. With the assumption of two to twenty LasR<sup>-</sup> cells per inoculum (t=0, ~  $10^5$   
128 cells), the model predicted that ~20% of the population would consist of LasR<sup>-</sup> cells by  
129 Day 4, with increased percentages of ~40% and ~80% by Days 6 and 8, respectively  
130 (**Fig. 1A**) (Heurlier et al., 2005). Only minor differences in percentages resulted from  
131 changes in the initial LasR<sup>-</sup> population.

132           We compared the model output to experimental data gathered with the same  
133 evolution regime. A single PA14 wild-type colony was used to inoculate a 5 mL culture  
134 of LB, which was grown to saturation and then used to inoculate three 5 mL LB cultures  
135 which were then passaged independently. Results from all three replicates from four  
136 independent experiments are shown. The percent of cells with LasR loss-of-function  
137 phenotypes were enumerated by plating and determining the percent of colonies with

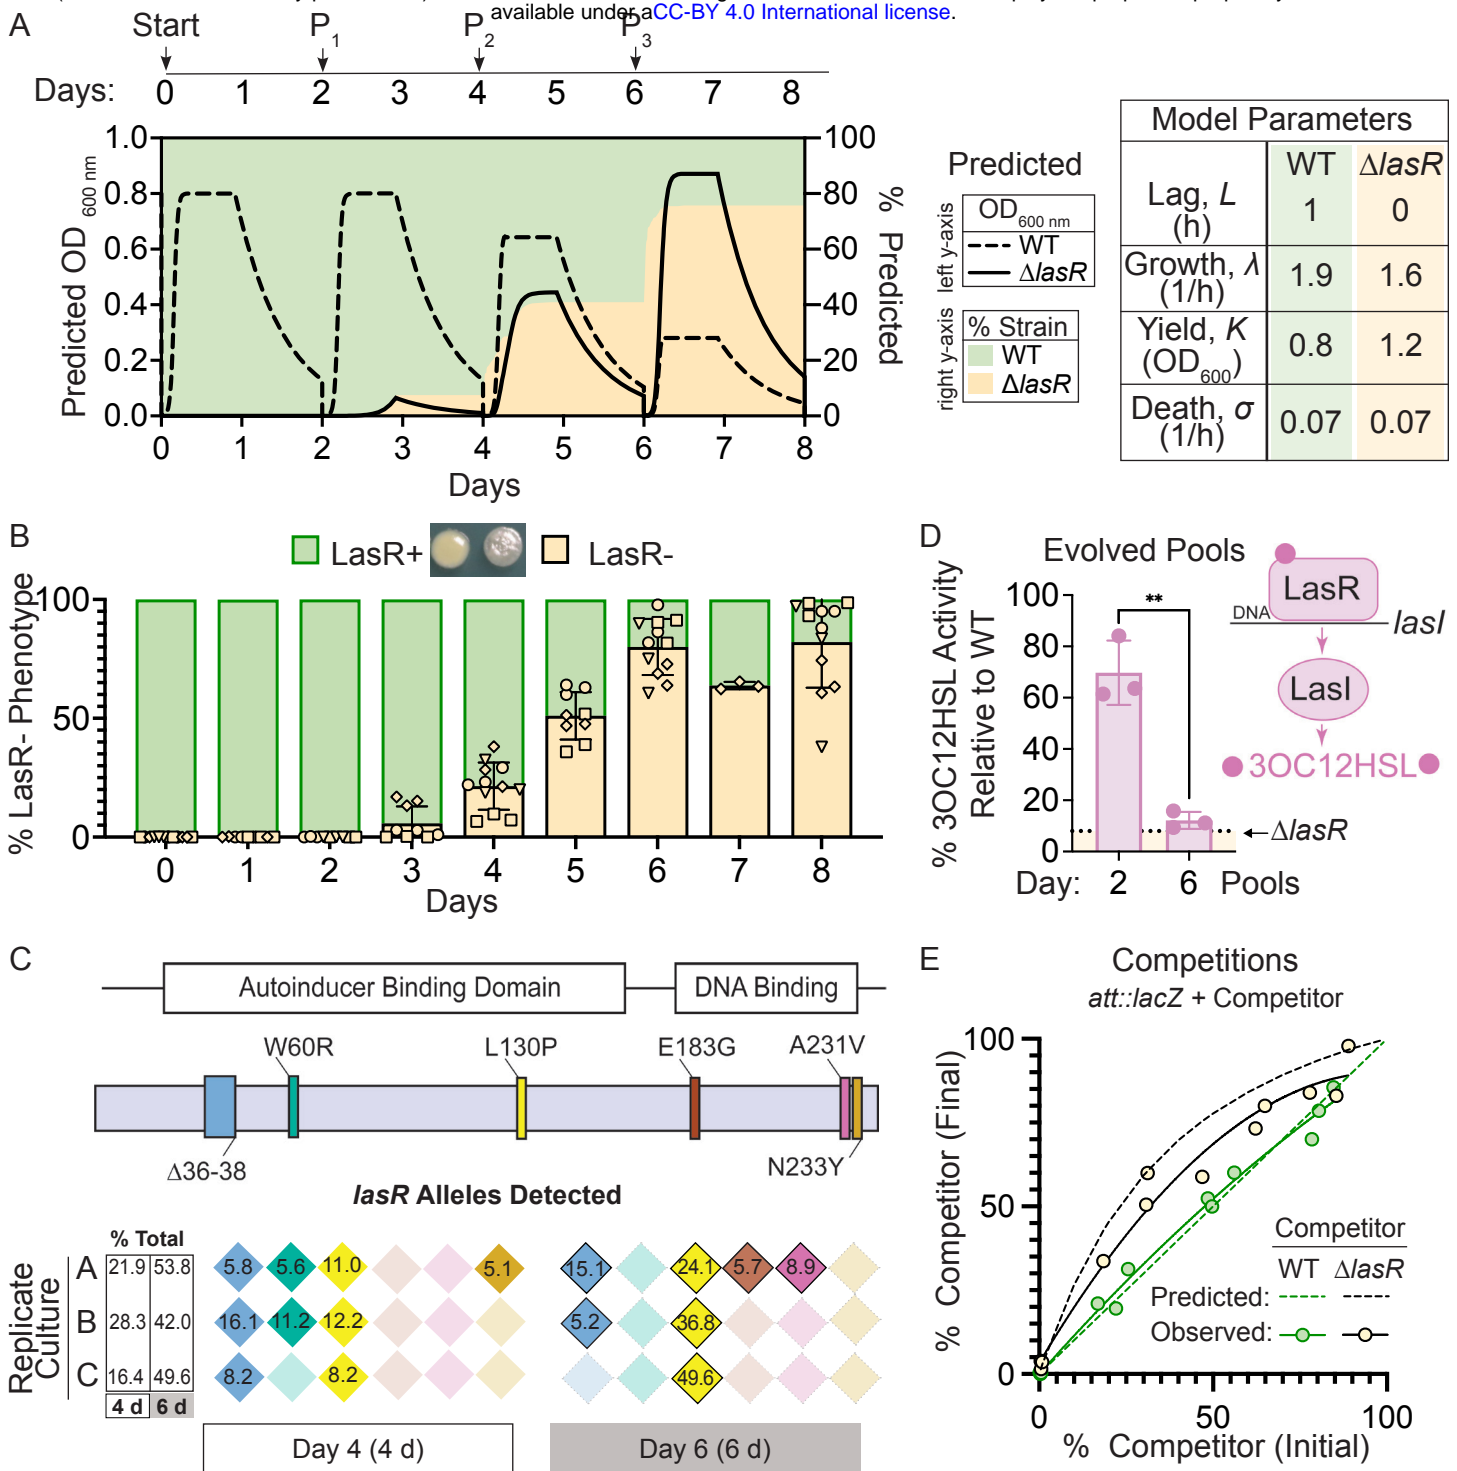

**Figure 1. Mathematical model built from monoculture growth data is sufficient to explain the rise of LasR loss-of-function strains.** A. Predicted densities (left y-axis) of mathematical model shown for wild type (WT, dashed line) and LasR- (solid line) strains. Predicted percentages (right y-axis) of LasR- (beige fill) and LasR+ (green fill) strains over the course of evolution regime in LB with passage ( $P_n$ ) every two days. Table shows experimentally-measured growth parameters obtained for strains PA14 WT and  $\Delta lasR$  in LB used to create the model. B. Percentage of LasR- phenotypes observed in  $n \geq 4$  independent evolution experiments in LB. A representative image of the smooth LasR+ and sheen LasR- colonies from Day 6 is shown. C. *lasR* alleles detected in the population at Day 4 (4 d) and Day 6 (6 d) by PoolSeq within the *lasR* coding sequence, which includes the autoinducer binding and DNA binding domains, for a representative experiment (diamond symbols, in B). The percentages of each allele and the sum indicated for each replicate culture. Each color represents a different allele. D. LasR regulates the production of its cognate autoinducer 3OC12HSL via direct transcriptional control of the gene encoding the LasI synthase. LasI-produced autoinducer activity of evolved pools from a representative experiment (diamond symbols, in B) at days two and six. Activity is presented as a percentage of that produced by unevolved WT monocultures. The levels produced by the engineered  $\Delta lasR$  control strain is shown for reference (dotted line). E. Comparison of predicted (dashed line) and observed (solid line) outcomes of competition assays initiated at different initial ratios for which a constitutively tagged WT (*att::lacZ*) was competed against  $\Delta lasR$  (beige, black line) or WT (control, green) competitors for 6 h (final) in planktonic LB cultures.



138 the characteristic “sheen” colony morphology of LasR<sup>-</sup> cells that results from  
139 accumulation of 4-hydroxy-2-heptylquinoline (HHQ) (**Fig. 1B**) (D’Argenio, Wu, Hoffman,  
140 Kulasekara, Déziel, et al., 2007). In all four independent experiments, the percentage of  
141 colonies with the LasR<sup>-</sup> phenotype rose from undetectable levels to an average of  
142 ~80% over the course of eight days (**Fig. 1B**). To validate the use of colony sheen as an  
143 indicator of the LasR<sup>-</sup> genotype, we evaluated  $\geq 90$  isolates with the characteristic  
144 LasR<sup>-</sup> colony morphology for other phenotypes associated with LasR loss-of-function:  
145 low production of proteases and autoinducers (3OC12HSL and C4HSL). Most of the  
146 predicted LasR<sup>-</sup> isolates (~90%) had phenotypes that mirrored those of the PA14  $\Delta lasR$   
147 strain, and not wild type (**Fig. S2**). Consistent with other studies (Feltner et al., 2016),  
148 approximately 15% of the cells with other LasR<sup>-</sup> phenotypes produced high levels of  
149 C4HSL even though 3OC12HSL production was low.

150 The percentage of LasR<sup>-</sup> cells predicted by the model matched the frequency of  
151 *lasR* alleles in genome sequence data from pools of colonies obtained from Day 4 and 6  
152 cultures of a representative experiment (diamond symbols in **Fig. 1B**). Across  
153 replicates, six non-synonymous mutations were identified in *lasR* in the regions  
154 corresponding to LasR autoinducer binding ( $\Delta 36-38$ , W60R, and L130P) and DNA  
155 binding domains (E183G, A231V, and N233Y) (**Fig. 1C** and **Table S1**), which are  
156 important for function (Feltner et al., 2016). No synonymous mutations in *lasR* were  
157 detected. Two mutations ( $\Delta 36-38$  and L130P) were present in all three replicate cultures  
158 at Day 4 and thus were likely present in the initial inoculum. In replicate A, two  
159 additional mutations in *lasR* (E183G and A231V) were identified at Day 6; the LasR  
160 A231V substitution has been extensively characterized as a loss-of-function mutation



161 through phenotyping and genetic complementation (Lujan, Moyano, Segura, Argarana,  
162 & Smania, 2007; Qi, Toll-Riera, Heilbron, Preston, & MacLean, 2016). The percentage  
163 of *lasR* mutants in the evolved population detected by sequencing at Day 4 ( $22.2$   
164  $\pm 6.0\%$  s.d.) and Day 6 ( $48.5 \pm 4.9\%$  s.d.) (**Fig. 1C**) closely resembled the percentage of  
165  $\text{LasR}^-$  strains predicted by the model ( $\sim 20\%$  and  $\sim 50\%$ , respectively) (**Fig. 1A**). The  
166 increased frequency of cells with the allele encoding the L130P substitution (McCready,  
167 Paczkowski, Henke, & Bassler, 2019) between Day 4 and Day 6, with 13.1%, 24.6%  
168 and 41.4% increases in replicate cultures, suggests strong selection for this particular  
169 variant or the presence of an additional mutation(s) in this background. In support of the  
170 significant increases in  $\text{LasR}^-$  subpopulations, the evolved cultures themselves had  
171 lower levels of the LasR-regulated autoinducer 3OC12HSL; by Day 2, culture  
172 3OC12HSL levels were  $\sim 30\%$  lower than a non-evolved wild-type culture, and showed a  
173  $\sim 90\%$  reduction by Day 6 (**Fig. 1D**).

174 To further test the predictive power of our model for the rise of  $\text{LasR}^-$  lineages, we  
175 initiated cultures with different ratios of a constitutively tagged wild type (*att::lacZ*) against  
176 untagged wild-type or  $\Delta\text{lasR}$  mutant competitors. A control assay demonstrated that the  
177 ratios of tagged and untagged wild type were unchanged over the course of growth, as  
178 shown previously (Clay et al., 2020; D. L. Mould et al., 2020). When the  $\Delta\text{lasR}$  competitor  
179 was cultured with the tagged wild type, the percentage of  $\Delta\text{lasR}$  mutant cells in the total  
180 population increased regardless of the initial percentage of  $\Delta\text{lasR}$  (1% to 85%) at the time  
181 of inoculation (**Fig. 1E**), and the model successfully predicted the extent to which the  
182  $\Delta\text{lasR}$  would outcompete the wild type over this range (**Fig. 1E-dotted line**).

183

184 **Activity of CbrAB, the two-component system that regulates carbon utilization, is**  
185 **required for the rise of LasR<sup>-</sup> strains.**

186 To test which genes or pathways were required to promote the selection of LasR<sup>-</sup>  
187 cells, we applied reverse genetics to experimental evolution. In *P. aeruginosa*, the  
188 sensor kinases of two-component systems, encoded throughout the genome, respond  
189 to a variety of diverse internal and environmental cues, such as nutrient limitation or  
190 stresses, that may be relevant to differential fitness (Rodrigue, Quentin, Lazdunski,  
191 Méjean, & Foglino, 2000; B. X. Wang, Cady, Oyarce, Ribbeck, & Laub, 2021). Using a  
192 library of 63 sensor kinase deletion mutants (B. X. Wang et al., 2021), we screened  
193 each mutant for the rise of LasR<sup>-</sup> phenotypes in triplicate in a 96-well plate format (**Fig.**  
194 **S3**). In the primary microtiter dish based screen, in which the investigators were blind to  
195 mutant strain identity, five gene knock-outs ( $\Delta cbrA$ ,  $\Delta gacS$ ,  $\Delta fleS$ ,  $\Delta PA14\_64580$ , and  
196  $\Delta PA14\_10770$ ) showed no detectable “sheen” colony phenotypes characteristic of  
197 LasR<sup>-</sup> strains in any of the three replicates (**Fig. S3 & Table S2**). In a secondary screen  
198 of these five mutants in five mL cultures, only the  $\Delta cbrA$  mutant (**Fig. 2A**) did not evolve  
199 LasR<sup>-</sup> phenotypes after serial passage; the other four mutants all had significant  
200 subpopulations with LasR<sup>-</sup> phenotypes by Day 6 (**Fig. S4A**). In addition, evolution  
201 experiments initiated with  $\Delta anr$  or  $\Delta rhlR$  mutants, which lack genes known to contribute  
202 to LasR<sup>-</sup> strain phenotypes and fitness (Chen, Déziel, Groleau, Schaefer, & Greenberg,  
203 2019; Clay et al., 2020), resembled wild type with at least 80% of colonies displaying  
204 LasR<sup>-</sup> phenotypes by Day 8 (**Fig. S4B**).

205 CbrA, through its regulation of the response regulator CbrB, (D'Argenio, Wu,  
206 Hoffman, Kulasekara, Déziel, et al., 2007; E. Sonnleitner, Abdou, & Haas, 2009),

207 controls *P. aeruginosa* preferential catabolism of certain carbon sources, such as  
208 succinate, over others (e.g. amino acids) through a process referred to as catabolite  
209 repression. In support of the finding that CbrA was essential for the evolution of LasR<sup>-</sup>  
210 lineages, the  $\Delta cbrB$  mutant also showed a striking and significant reduction in LasR<sup>-</sup>  
211 phenotypes over the course of eight days (**Fig. 2A**). Additionally, evolution experiments  
212 in a LasR<sup>+</sup> cystic fibrosis clinical isolate (DH2417) showed a similar rise in LasR<sup>-</sup>  
213 phenotypes over the course of evolution, which was not observed in a  $\Delta cbrB$  derivative  
214 (**Fig. 2A**). CbrAB-controlled catabolite repression is regulated by Crc, in complex with  
215 the RNA-binding protein Hfq, which together repress the translation of target mRNAs  
216 involved in the transport and catabolism of less preferred substrates (**Fig. 2B**)  
217 (Elisabeth Sonnleitner, Prindl, & Bläsi, 2017). Crc activity is down regulated by the small  
218 RNA *crcZ*, which sequesters Crc away from its mRNA targets. The CbrAB two  
219 component system transcriptionally regulates levels of *crcZ* (**Fig. 2B**) (E. Sonnleitner et  
220 al., 2009) in response to signals that have yet to be described.

221 Consistent with the absence of LasR<sup>-</sup> phenotypes in evolved  $\Delta cbrA$  or  $\Delta cbrB$   
222 cultures, Pool-Seq analysis found no mutations in *lasR* at either Day 4 or 6 (**Fig. 2C**, pink  
223 and **Table S1**) which was in striking contrast to the multiple LasR<sup>-</sup> alleles observed in wild  
224 type cultures. The absence of *lasR* mutations in the  $\Delta cbrA$  and  $\Delta cbrB$  derivatives was not  
225 due to differences in mutation frequency or number of generations as other mutations in  
226 distinct pathways under selection (e.g. *fleR* in **Fig. 2C**) were present at comparable levels  
227 in all cultures (**Table S1** for data). In addition, strain PA14 wild type and the  $\Delta cbrA$  mutant  
228 had similar growth patterns as assessed by daily optical density measurements (**Fig.**  
229 **S4C**). We also assessed a number of factors other than differential growth that could

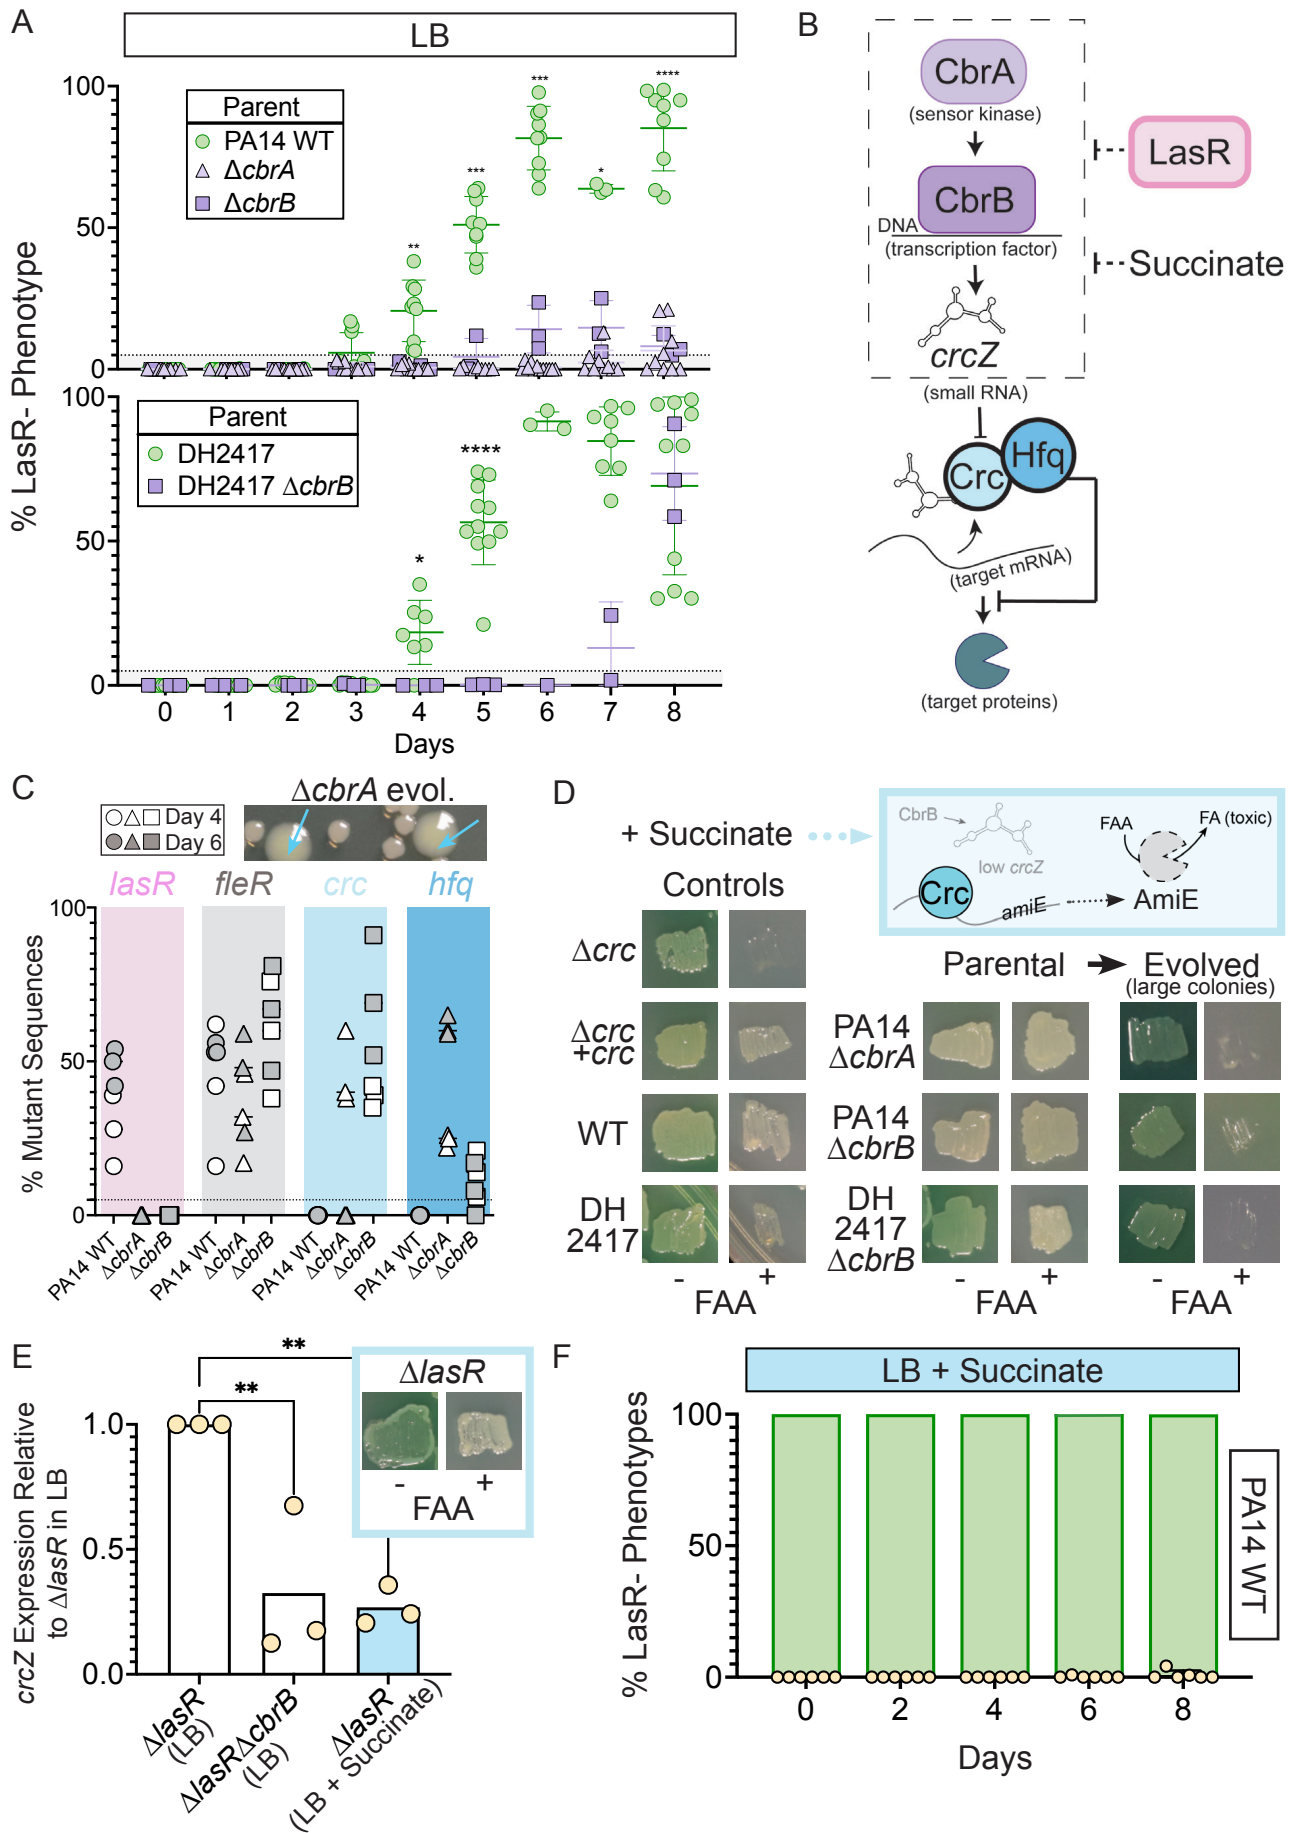

**Figure 2. Activity of the carbon catabolite repression system is required for LasR- selection in LB.** A. The percentage of colonies with LasR- phenotypes enumerated over the course of evolution for  $\Delta cbrA$  or  $\Delta cbrB$  mutants (purple triangle and square, respectively) in strains PA14 or a LasR+ cystic fibrosis isolate (DH2417) relative to “wildtype” comparators. PA14 WT strain data is the same as in Figure 1B ( $n \geq 3$ ). Statistical significance determined between percent LasR- phenotypes in CbrA/B+ and *cbrA/B* mutant pools at each day via Two-Way ANOVA with Dunnett’s multiple hypothesis correction. \*,  $p < 0.05$ ; \*\*,  $p < 0.005$ ; \*\*\*,  $p < 0.0005$ ; \*\*\*\*,  $p < 0.0001$ . B. The carbon catabolite repression system promotes the preferential consumption of succinate (and other preferred substrates) through the two-component system CbrAB. CbrA activates its response regulator CbrB which directly induces expression of the small RNA *crcZ*. *crcZ* sequesters Crc thereby allowing translation of the target gene to occur. Often the target gene enables the utilization of specific (i.e. less preferred) substrates. In a catabolite repressed state, such as when succinate is present, Crc binds to target mRNA with the RNA binding protein Hfq and blocks translation. CbrB protein levels are higher in strains lacking LasR function, but the mechanism linking these pathways is uncharacterized. C. Percent total mutant alleles in *lasR* (pink bar), *fleR* (grey bar), *crc* (light blue bar), and *hfq* (darker blue bar) in a representative experiment (Fig. 1B, diamond symbols) for PA14 wild type,  $\Delta cbrA$ ,  $\Delta cbrB$  evolved populations sequenced on days four (white filled symbol) and six (grey filled symbol). Representative image of the larger colony morphologies observed in the evolved pools from CbrA/B- deficient strains ( $\Delta cbrA$  shown) above. D. Crc represses *amiE* encoding an amidase that can turnover the fluoroacetamide (FAA) protoxin to fluoroacetate (FA) mediating cell death. In the presence of succinate, cells with functional Crc survive in the presence of FAA. PA14 WT, PA14  $\Delta cbrA$ , PA14  $\Delta cbrB$ , and DH2417 WT strains were included as controls. The  $\Delta cbrA$  and  $\Delta cbrB$  parental strains used for the evolution experiments and representative colonies that emerged with a larger colony size in these backgrounds were patched (or struck out) onto succinate containing plates in the absence and presence of the FAA protoxin. E. *crcZ* expression of PA14  $\Delta lasR$  in LB (white bar) and LB with 40 mM succinate (blue bar) measured by qRT-PCR and plotted relative to expression of  $\Delta lasR$  in LB ( $n = 4$ ). Inset shows representative image of  $\Delta lasR$  grown on succinate containing plates in the absence and presence of FAA. F. Percentage of colonies with LasR- phenotypes observed in evolution experiment initiated with strains PA14 WT in LB supplemented with 40 mM succinate ( $n = 6$ ).

230 affect the rise of LasR<sup>-</sup> lineages. A previous report (Heurlier et al., 2005) found that LasR<sup>-</sup>  
231 strains in the PAO1 background undergo less severe alkaline-induced lysis in another  
232 complex medium (nutrient yeast broth) when grown aerobically, but we found no evidence  
233 of differential lysis in LB between wild-type and  $\Delta lasR$  strains under our conditions (**Fig.**  
234 **S1A**). Furthermore, buffering the medium to pH 7 suppressed medium alkalinization (from  
235 pH of 6.8 to 8.5) and lysis (Crocker et al., 2019), but not the rise of LasR<sup>-</sup> lineages;  
236 though, the kinetics of LasR<sup>-</sup> lineage detection was delayed with buffering (**Fig. S4D** and  
237 (Sandoz et al., 2007)). Lastly, to assess potential differences in toxicity of the wild type  
238 and  $\Delta cbrB$  mutant culture supernatants towards LasR<sup>-</sup> cells through the production of  
239 secreted factors (Yan et al., 2018), we grew the  $\Delta lasR$  mutant in spent filtrate from wild-  
240 type and  $\Delta cbrB$  cultures; no significant differences in colony forming units were observed  
241 (**Fig. S4E**).

242         The activation of CbrAB increases growth on diverse metabolites by inducing  
243 *crcZ* which sequesters Crc away from the targets that it transcriptionally represses (**Fig.**  
244 **2B** for pathway). In D'Argenio et al (D'Argenio, Wu, Hoffman, Kulasekara, Deziel, et al.,  
245 2007; D'Argenio, Wu, Hoffman, Kulasekara, Déziel, et al., 2007), higher CbrB levels  
246 were observed in LasR<sup>-</sup> strains in a proteomics analysis, but no direct interactions  
247 between LasR and components of CbrA-CbrB-*crcZ*-Crc pathway have been described.  
248 Because CbrA, CbrB, and *crcZ* act to repress Crc, we hypothesized that if the loss of  
249 LasR function led to higher activity of the CbrA-CbrB-*crcZ* pathway and less Crc  
250 translational repression, we might also observe loss-of-function mutations in the genes  
251 encoding Crc or Hfq (**Fig. 2B**). Interestingly, the pooled genome sequence data from  
252 the Day 4 (open symbols) and Day 6 (grey symbols) populations evolved in the  $\Delta cbrA$

253 and  $\Delta cbrB$  backgrounds identified seven different mutations in *crc*, including three  
254 nonsense mutations, four missense mutations, and six indels, and these were among  
255 the most abundant mutations in the  $\Delta cbrB$  mutant cultures; no *crc* mutations were  
256 identified in the PA14 wild type evolved populations (**Fig. 2C**). In  $\Delta cbrB$ , *crc* mutant  
257 alleles showed the largest rise between Day 4 and Day 6 across all three replicate  
258 cultures (**Table S1**). In the  $\Delta cbrA$  passaged cultures, we also identified a rise in *hfq*  
259 mutations within the coding and upstream intergenic regions (**Fig. 2C** and **Table S1** for  
260 sequence data) in addition to mutations in *crc*. The changes in relative abundances of  
261 alleles with mutations in *crc* and either the promoter or coding regions of *hfq* across the  
262 two days suggested that *hfq* mutations and *crc* mutations were in different backgrounds  
263 (**Table S1**).

264 To assess Crc-Hfq function in evolved strains, we leveraged Crc translational  
265 repression of the amidase AmiE, which cleaves the prototoxin fluoroacetamide (FAA) to  
266 the toxic fluoroacetate (FA) (**Fig. 2D** for pathway) (O'Toole, Gibbs, Hager, Phibbs, &  
267 Kolter, 2000). Succinate, which downregulates CbrAB activity, maintains repression of  
268 AmiE, thereby enabling wild type to grow in the presence of FAA. In the absence of  
269 functional Crc or its co-repressor Hfq, cells synthesize AmiE, and FAA conversion into  
270 FA inhibits growth. As expected, on medium with succinate, FAA inhibited growth of the  
271  $\Delta crc$  mutant, but did not affect growth of the complemented  $\Delta crc + crc$  strain, the wild  
272 type and the  $\Delta cbrA$  and  $\Delta cbrB$  mutants. However, in passaged  $\Delta cbrA$  and  $\Delta cbrB$   
273 cultures, spontaneous mutants in the population gave rise to larger colonies (**Fig. 2C**,  
274 top), and these isolates were FAA sensitive (**Fig. 2D**) supporting the model that in the  
275  $\Delta cbrA$  and  $\Delta cbrB$  backgrounds, mutations that abolished Crc or Hfq activity arose.



276 Secondary mutants with FAA sensitivity also arose in the DH2417  $\Delta cbrB$  background  
277 upon passaging, indicating that this phenomenon was not unique to the PA14  
278 background and another study also reported *crc* and *hfq* mutants in the absence of *cbrB*  
279 (Boyle et al., 2017). Given the apparent selection for decreased Crc function in  $\Delta cbrA$   
280 and  $\Delta cbrB$ , and the requirement of *cbrA* or *cbrB* for LasR<sup>-</sup> strain selection, we  
281 hypothesized that increased CbrAB activity may be a trait that increases the fitness of  
282 LasR<sup>-</sup> strains.

283 To complement the genetics approach of evolution assays in *cbrAB* mutants, we  
284 monitored the rise of LasR<sup>-</sup> lineages in LB medium supplemented with succinate, which  
285 inhibits CbrAB activity (E. Sonnleitner et al., 2009). Medium amendment with 40 mM  
286 (pH 7) succinate was sufficient to repress CbrB-regulated *crcZ* small RNA expression in  
287  $\Delta lasR$  to levels reminiscent of  $\Delta lasR \Delta cbrB$  (**Fig. 2D**). The repression of *crcZ* in  $\Delta lasR$  by  
288 succinate and  $\Delta lasR$  growth on FAA + succinate, unlike  $\Delta crc$  (**Fig. 2E**, inset), indicated  
289 that  $\Delta lasR$  retains the control of Crc-Hfq mediated regulation. Succinate amendment  
290 suppressed the rise of LasR<sup>-</sup> phenotypes in PA14 wild type (**Fig. 2F**).

291

292 **Elevated *cbrB* and *crcZ* expression and reduced Crc-dependent repression are**  
293 **sufficient to recapitulate the growth advantages of LasR<sup>-</sup> strains.**

294 CbrAB activity induces the expression of *crcZ*, which sequesters Crc. We found  
295 that the  $\Delta lasR$  mutant had ~ two-fold higher *crcZ* levels compared to wild type,  
296 indicating higher activity of the CbrAB two component system in LasR<sup>-</sup> strains (**Fig.**  
297 **3A**). Previous work reported higher yields on phenylalanine for LasR<sup>-</sup> relative to LasR<sup>+</sup>  
298 strains concomitant with elevated CbrB protein levels in a proteomics analysis

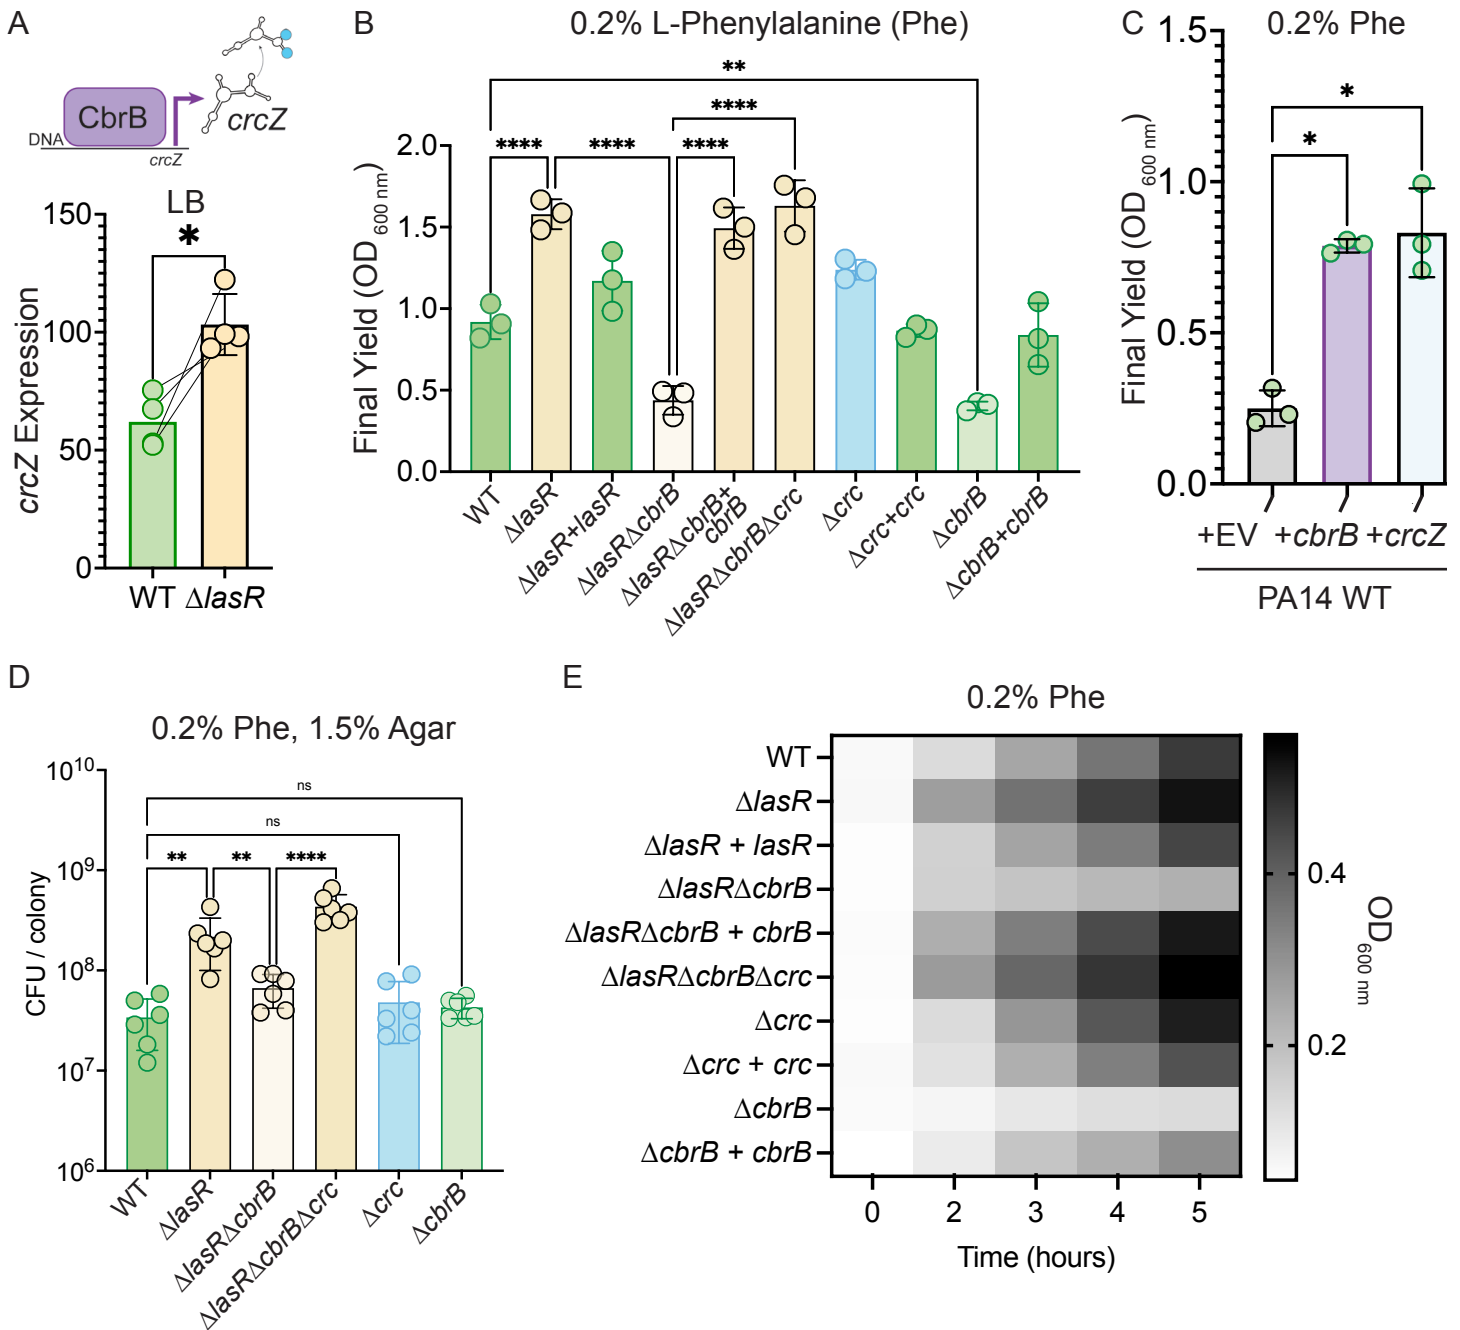

**Figure 3. Increased CbrB activity of LasR- strains is necessary and sufficient to promote growth on non-repressive substrates like phenylalanine via Crc.** A. CbrB promotes the transcription of *crcZ*, and *crcZ* is thus a direct readout of CbrB transcriptional activity. *crcZ* expression was measured by qRT-PCR relative to the average expression of the housekeeping genes *rpoD* and *rpsL* in cultures of PA14 WT and  $\Delta lasR$  strains grown to  $OD_{600\text{ nm}} = 1$  from four independent experiments. \*,  $p < 0.05$  as determined by Student's t-test. B. Final yield on phenylalanine (Phe) as a sole carbon source shows enhanced growth for  $\Delta lasR$ , *cbrB* dependence, and the requirement for *cbrB* is abolished by deletion of *crc*. Each point is the average of three replicates, repeated three independent days. Statistical significance determined by one-way ANOVA with Šídák's multiple comparisons test. ns, not significant. \*,  $p < 0.05$ . \*\*,  $p < 0.005$ . \*\*\*\*,  $p < 0.0001$ . C. Final yield on Phe under (0.2%) arabinose-inducing conditions for the PA14 WT strain expressing an empty vector or *crcZ*, and *cbrB* overexpression constructs. Each point is the average of three replicates, performed on three separate days. Statistical significance determined by one-way ANOVA with multiple hypothesis correction. D. Colony counts (CFU) from resuspended colony biofilms grown on Phe as a sole carbon source for 24 h. Each point is a single replicate and the experiment was performed on six independent days. Statistical significance determined by one-way ANOVA with Šídák's multiple comparisons test. E. Heatmap representation density during planktonic growth as measured by  $OD_{600\text{ nm}}$  on phenylalanine as a sole carbon source.  $n = 3$ . From same growth data used to generate Fig. 3B.

299 (D'Argenio, Wu, Hoffman, Kulasekara, Deziel, et al., 2007). Thus, we used  
300 phenylalanine along with other growth substrates to further dissect the activity of the  
301 CbrAB-*crcZ*-Crc pathway (**Fig. 2A**) in LasR<sup>-</sup> strains. In planktonic cultures in medium  
302 with phenylalanine as a sole carbon source, the  $\Delta$ *lasR* strain obtained significantly  
303 higher yields than the wild type and the enhanced growth phenotype was  
304 complementable by *lasR* (**Fig. 3B**). As previously reported, growth on phenylalanine  
305 depended on *cbrB*; the  $\Delta$ *cbrB* and  $\Delta$ *lasR* $\Delta$ *cbrB* mutants grew similarly poorly and their  
306 growth could be fully complemented by expressing *cbrB* (**Fig. 3B**). Deletion of *crc* in the  
307  $\Delta$ *lasR* $\Delta$ *cbrB* strain also restored growth to levels comparable to the  $\Delta$ *lasR* and  
308  $\Delta$ *lasR* $\Delta$ *cbrB* + *cbrB* strains (**Fig. 3B**) indicating Crc repression of phenylalanine  
309 catabolism in the absence of CbrB. Overexpression of either *cbrB* or its target *crcZ*,  
310 which acts as a Crc-sequestering agent, was sufficient to improve yields on  
311 phenylalanine relative to the empty vector control (**Fig. 3C**). The CbrB- and Crc-  
312 controlled growth advantage on phenylalanine for LasR<sup>-</sup> strains in planktonic cultures  
313 was also apparent in colony biofilms (**Fig. 3D**). One interesting difference between  
314 planktonic and biofilm assays was the differing requirement for CbrB for robust growth  
315 of wild type (**Fig. 3B** versus **3D**). On other substrates for which catabolism is under the  
316 control of Crc, e.g. mannitol and glucose, LasR<sup>-</sup> strains showed complementable CbrB-  
317 dependent growth advantages over the wild type (**Fig. S5A**). While deletion of *crc* was  
318 able to restore enhanced growth to the  $\Delta$ *lasR* $\Delta$ *cbrB* mutant,  $\Delta$ *crc* did not grow as  
319 robustly as the  $\Delta$ *lasR* mutant which is consistent with the detection of LasR<sup>-</sup> lineages  
320 but not Crc<sup>-</sup> lineages in passaged wild type cultures.

321 In addition to the higher yields relative to the wild type with phenylalanine as the  
322 sole carbon source, the  $\Delta lasR$  strain also had a reduction in lag phase similar to what  
323 was observed in LB medium (**Fig. S1**). As shown in **Fig. 3E**, which displays kinetic data  
324 collected up to 5 hours from the experiments used to generate the data in **Fig. 2B**,  
325  $\Delta lasR$  or  $\Delta lasR\Delta cbrB\Delta crc$  had markedly higher levels of growth by 2 hours after an LB-  
326 grown inoculum was transferred into fresh medium with phenylalanine as the sole  
327 carbon source, and higher  $\Delta lasR$  densities persisted in exponential phase. The  
328  $\Delta lasR\Delta cbrB$  mutant lacked this early growth enhancement and this defect was  
329 complementable. Thus,  $LasR^-$  strains from stationary phase cultures appear to be  
330 primed for growth on single carbon sources under CbrB-Crc control.

331

332 **LasR<sup>-</sup> strains have CbrB-dependent growth advantages on metabolites enriched**  
333 **in progressive cystic fibrosis lung infections.**

334 Loss-of-function mutations in *lasR* are commonly detected in samples from  
335 chronic *P. aeruginosa* lung infections in pwCF, and these mutants have been correlated  
336 with a more rapid rate in lung function decline (Hoffman et al., 2009). To determine the  
337 metabolite milieu in the CF lung, we performed a metabolomics analysis of  
338 bronchioalveolar lavage samples collected from ten pwCF and ten non-CF individuals  
339 (**Table S3**). The pwCF were infected with diverse pathogens and had varying lung  
340 function, which was measured as forced expiratory volume in one second and  
341 presented as the percent expected at one's age (%FEV<sub>1</sub>). Over 300 compounds were  
342 measured, and no uniquely microbial metabolites were noted. Many compounds were  
343 higher in the CF population, but some were unchanged (e.g. glucose) and others were

344 higher in non-CF samples (e.g. adenosine and glutathione as previously published  
345 (Esther et al., 2008; Fitzpatrick, Park, Brown, & Jones, 2014) (**Table S4**).

346 In a principal component analysis (PCA), samples from non-CF individuals  
347 clustered together while those from pwCF were more spread. Samples from pwCF with  
348 high lung function (112 or 113 %FEV<sub>1</sub>) grouped among the non-CF samples (**Fig. 4A**).  
349 The metabolites that contributed strongly to the first principal component, PC1, showed  
350 a significant inverse correlation with %FEV<sub>1</sub> including phenylalanine, arginine, lactate  
351 and citrate. As for phenylalanine (**Fig. 3B & D**), the  $\Delta lasR$  strain had growth advantages  
352 on arginine, lactate, and citrate that were controlled by CbrB and Crc (**Fig. S5B,C**).

353 We identified the twenty carbon sources that were most enriched in CF samples  
354 including those that correlated inversely with lung function, then used a BIOLOG  
355 phenotype array to assess whether the trend of greater yield for the  $\Delta lasR$  strain  
356 persisted across this set. We confirmed that the  $\Delta lasR$  strain reached significantly  
357 higher yields on the metabolites including phenylalanine, arginine, and lactate and that  
358 overall  $\Delta lasR$  showed better growth than the wild type (**Fig. 4C**).

359 To further test the hypothesis that LasR<sup>-</sup> strains evolved due to enhanced  
360 growth in the nutrient environment of the CF lung, we performed evolution experiments  
361 using both strain PA14 and a LasR<sup>+</sup> CF clinical isolate in a medium designed to more  
362 closely recapitulate the nutritional profile of the cystic fibrosis airway. Upon absolute  
363 quantitation, we observed good concordance between the relative abundances of amino  
364 acids found in BAL fluid and reported for sputum (Palmer, Mashburn, Singh, & Whiteley,  
365 2005) which served as a basis for an artificial sputum medium, ASM (**Fig. S6**) (Clay et  
366 al., 2020) which was based on a previously reported synthetic CF medium (SCFM2)

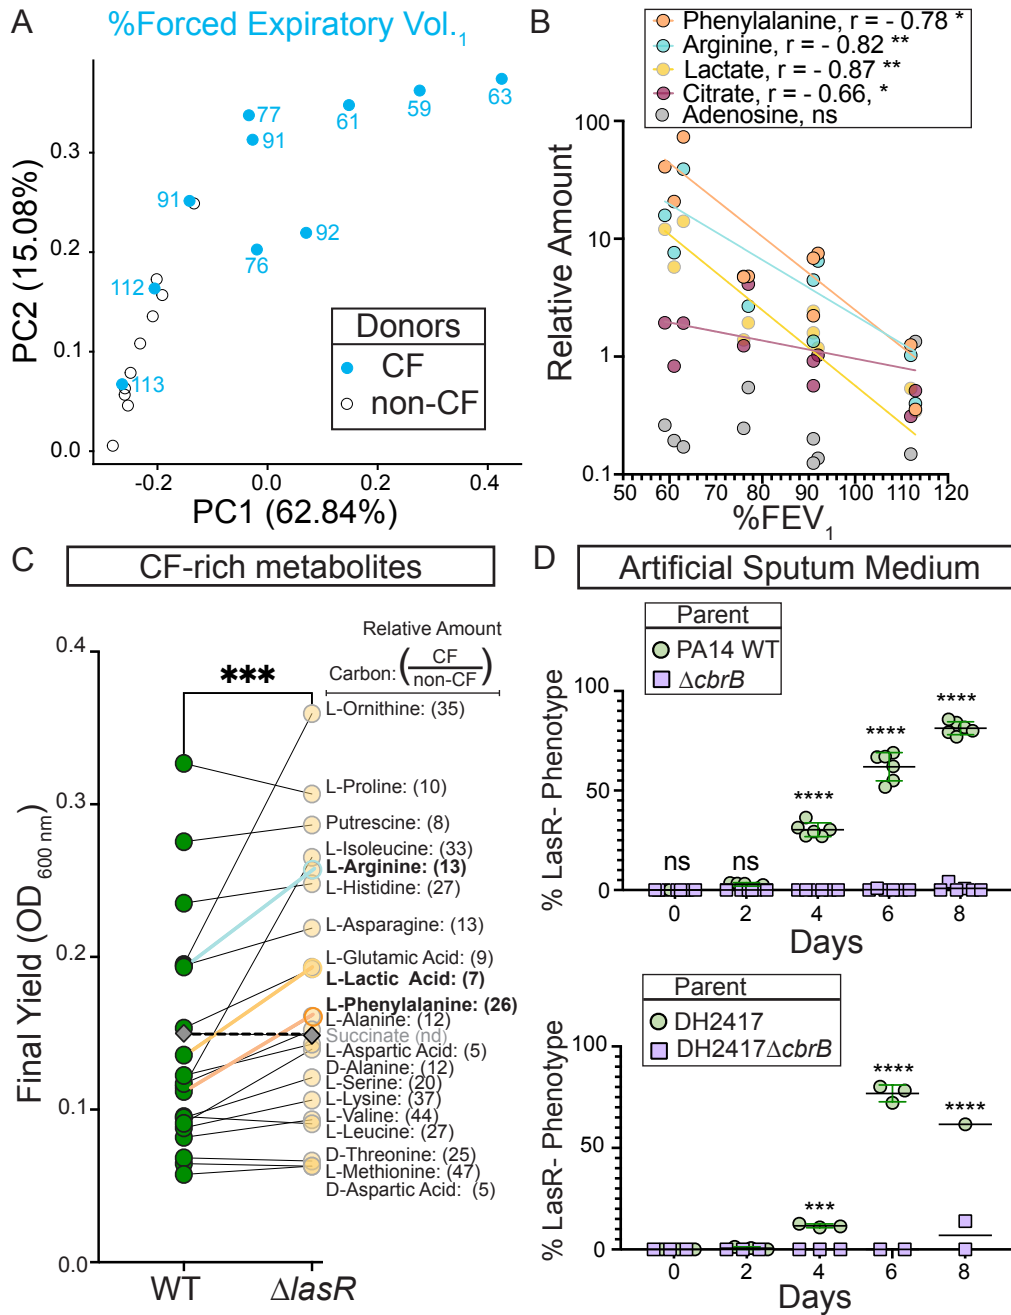

**Figure 4. CbrB-dependent growth advantages may contribute to *lasR* mutant selection in distinct nutrient profiles of progressive cystic fibrosis airways.**

A. The first two dimensions (PC1 and PC2) of a principal component analysis of log normalized metabolite counts from bronchoalveolar lavage (BAL) samples collected from cystic fibrosis (CF, blue) and non-cystic fibrosis (non-CF, grey) donors explain 62.84% and 15.08% of the variation in the data, respectively. PC1 separates the metabolite data by relative lung function as measured by percent forced expiratory volume in 1 sec (%FEV<sub>1</sub>) for samples from people with CF. The %FEV<sub>1</sub> is overlaid for CF-donor samples with text. Samples from non-CF donors group more closely with CF-donor samples that have high lung function. B. Spearman correlation analysis of the relative phenylalanine (orange), arginine (aqua), lactate (yellow), and adenosine (grey) metabolite counts in the BAL samples relative to %FEV<sub>1</sub>. C. Final yield measured after 24 h for strains PA14 WT and  $\Delta lasR$  on a subset of carbon sources in BIOLOG growth assays for which the metabolite was found to be in higher abundance in CF-donor relative to non-CF donor BAL samples. Bold font indicates carbon sources analyzed in Fig. 3 and Supp. Fig. 5. Number in parenthesis refers to the ratio of the average counts for each metabolite in CF relative to non-CF samples. D. Observed percentage of colonies with LasR- phenotype over the course of evolution from strains (top) PA14 WT or (bottom) CF isolate (both green circles) with  $\Delta cbrB$  (purple squares) derivatives in artificial sputum medium (ASM), which was designed to recapitulate the CF lung nutritional profile. \*\*\*,  $p = 0.0008$ ; \*\*\*\*,  $p < 0.0001$  as determined by ordinary two-way ANOVA with Šidák's multiple comparisons test.

367 (Palmer et al., 2005). LasR<sup>-</sup> strains evolved in both strain backgrounds (**Fig. 4D**) with  
368 kinetics similar to what was observed in LB medium (**Fig. 1B**). Parallel evolution  
369 experiments in ASM initiated with  $\Delta cbrB$  derivatives did not exhibit a rise in LasR<sup>-</sup>  
370 phenotypes in either strain background to suggest that CbrAB activity was again a  
371 contributor to the fitness of *lasR* loss-of-function mutants.

372

### 373 **Discussion**

374 Through mathematical modeling, experimental evolution and competition assays,  
375 we found that the rise of problematic *P. aeruginosa* LasR<sup>-</sup> variants frequently observed  
376 in disease could be explained by increases in yield and decreases in lag during growth  
377 on carbon sources abundant in the lung environment (**Fig. 5**). In fact, the steady state  
378 growth rate for  $\Delta lasR$  was slightly less than that for the wild type, which is consistent  
379 with the model that there are frequently tradeoffs between a shorter lag phase and  
380 overall growth rate (Basan et al., 2020). Interestingly, CF-adapted *P. aeruginosa*  
381 isolates have been found to have slower *in vitro* growth rates than other strains (Yang et  
382 al., 2008). Other factors will impact the relative fitness of LasR<sup>+</sup> and LasR<sup>-</sup> cells across  
383 different growth phases (**Fig. 5**) including oxygen availability and pH buffering capacity,  
384 which may lead to differential lysis (Heurlier et al., 2005), or the need for (or exploitation  
385 of) proteases to gain access to growth substrates (Barbieri, Delden, Pesci, Pearson, &  
386 Iglewski, 1998; Sandoz et al., 2007).

387 Data presented support the model that that increased growth of LasR<sup>-</sup> cells on  
388 many amino acids, sugars and lactate, is due to higher CbrAB-controlled *crcZ* levels  
389 which downregulates metabolism under Crc control, and these findings nicely parallel



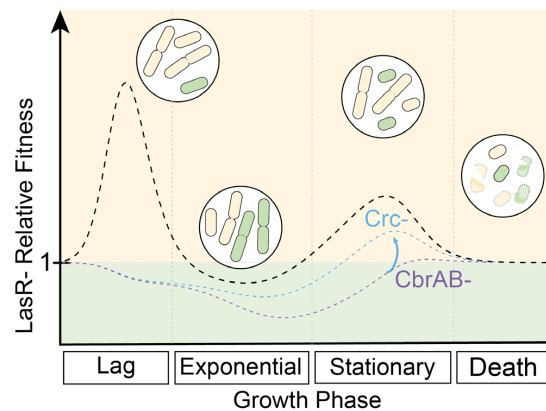

**Figure 5. CbrAB activity contributes to the positive selection of LasR- strains in complex media.** LasR- strain fitness relative to wild type is shown across growth phases, including lag, exponential growth, stationary, and death phases. Relative fitness of LasR- strain (dotted black line) is calculated from the experimentally determined monoculture growth data of strains PA14 wild type (WT) and  $\Delta lasR$  over time. Values above one indicate a LasR- strain fitness advantage over the WT strain during that growth phase. Circled insets show representative cartoons of LasR- (beige) and LasR+ (green) cells at each growth phase to indicate dividing or lysing cells (burst cells) across growth stages. The heights of the peaks or valleys of the relative fitness lines can be altered by several modulating factors including those that contribute to the positive and negative selection of LasR- strains. Other modulating factors reported or suggested in the literature include inter- and intra- species competition, extracellular protease, immunoclearance, and oxygenation which are likely condition dependent. In the absence of CbrA or CbrB (CbrAB-, dotted purple line) or in the presence of succinate (one CbrAB repressive substrate), the relative fitness of LasR- strains is lower resulting in a reduction in the observed selection. This could be partially relieved in the CbrAB- background through disruption of Crc or Hfq function (blue dotted line), restoring activity through the pathway.

390 studies by D'Argenio et al. (D'Argenio, Wu, Hoffman, Kulasekara, Déziel, et al., 2007)  
391 that found higher levels of CbrB in LasR<sup>-</sup> isolates. In  $\Delta cbrA$  and  $\Delta cbrB$  mutants, *lasR*  
392 loss-of-function mutations did not arise, but mutations in *crc* and upstream of *hfq* were  
393 observed. As *crc* mutations phenocopy many of the growth advantages of the *lasR*  
394 mutants (**Fig. 2C**, **Fig. 3**, **Fig. S5**), the importance of derepressed catabolism for fitness  
395 is underscored. Though deletion of *cbrA* or *cbrB* can have pleiotropic effects (Yeung,  
396 Bains, & Hancock, 2011), we did not observe differences in density, quorum sensing  
397 regulation and production of quorum sensing controlled factors such as proteases, lysis  
398 in stationary phase, or overall mutation accumulation between wild type,  $\Delta cbrA$ , and  
399  $\Delta cbrB$  that could explain differences in the rise of LasR<sup>-</sup> subpopulations. Furthermore,  
400 environmental modification of CbrB activity by the addition of succinate to LB (E.  
401 Sonnleitner et al., 2009) also suppressed the emergence of LasR<sup>-</sup> strains in the wild

402 type. Because CbrAB activity can still be suppressed by succinate in LasR<sup>-</sup> cells (**Fig.**  
403 **2E**), LasR<sup>-</sup> variants were not strictly “de-repressed”, and this is consistent with the fact  
404 that  $\Delta lasR$  and  $\Delta crc$  growth patterns were not identical. Unlike *lasR* mutations, *crc*  
405 mutations are not commonly observed in clinical isolates (Winstanley, O'Brien, &  
406 Brockhurst, 2016) and thus are likely also under negative selection despite some growth  
407 advantages (Lorenz et al., 2019). Several CF isolates show reduced succinate  
408 assimilation to suggest the uptake of less preferred substrates over the course of  
409 adaptation (Jørgensen et al., 2015; La Rosa, Johansen, & Molin, 2018).

410         Analysis of BAL fluid revealed higher levels of substrates such as lactate and  
411 amino acids, which require CbrB for consumption in samples from pwCF, and these  
412 findings are consistent with other more targeted analyses of CF airway samples (Bensel  
413 et al., 2011; Twomey et al., 2013). Consistent with our finding that higher levels of  
414 certain metabolites correlated with worse CF lung disease, other studies including that  
415 of Esther et al. (Esther et al., 2016) found a correlation between total metabolites and  
416 neutrophil counts suggesting host cell lysis, along with lysis of microbial cells, may be a  
417 major contributor to a shift in the metabolome. CF-lung derived *P. aeruginosa* isolates  
418 can have amino acid auxotrophies and enhanced amino acid uptake (La Rosa,  
419 Johansen, & Molin, 2019) which supports ready access to amino acids *in vivo*.

420         Our model predicts LasR<sup>-</sup> strains benefit from growth advantages that might be  
421 present when new nutrients become available (analogous to lag phase) and in dense  
422 populations when improved yields for the  $\Delta lasR$  mutant emerges; due to a slower  
423 steady-state growth rate, we predict that LasR<sup>-</sup> strains would not emerge under steady-  
424 state growth conditions such as in a chemostat. Indeed, the advantages of decreased

425 lag phase in cultures, even at the expense of steady-state growth rates, has been  
426 proposed to be a universal adaptation in dynamic environments (Basan et al., 2020).  
427 Thus, the frequent emergence of LasR<sup>-</sup> lineages in the CF lung and other disease  
428 settings suggests that *P. aeruginosa* often undergoes growth transitions *in vivo*,  
429 possibly due to fluctuating local conditions, spatial heterogeneity, or the result of  
430 complex competition between bacterial and host cell types. In addition, the loss of LasR  
431 function enables other inherent advantages that contribute to competitive fitness  
432 including resistance to lysis under conditions of high aeration, enhanced microoxic  
433 fitness, enhanced RhIR activity (Chen et al., 2019; Clay et al., 2020; D'Argenio, Wu,  
434 Hoffman, Kulasekara, Deziel, et al., 2007; Heurlier et al., 2005); the connection between  
435 these phenotypes and the CbrAB-*crcZ*-Crc pathway is not yet clear.

436         The increased growth in post-exponential phase cultures for LasR<sup>-</sup> strains bears  
437 similarities to mutations that arise in other microbes. For example, the selection for *rpoS*  
438 mutants in stationary phase cultures of *E. coli* (Finkel & Kolter, 1999; Zambrano,  
439 Siegele, Almirón, Tormo, & Kolter, 1993; Zinser & Kolter, 2000) is also dependent on  
440 nutrient accessibility (Farrell & Finkel, 2003) with enhanced amino acid catabolism as a  
441 major contributor to *E. coli* lineages with growth advantages in stationary phase (GASP)  
442 (Zinser & Kolter, 1999). While the rise of *rpoS* mutants in laboratory settings required  
443 pH-driven lysis (Farrell & Finkel, 2003), LasR<sup>-</sup> strains still evolved in buffered medium  
444 suggesting distinct mechanisms for the metabolic advantages of *lasR* mutants. It is  
445 worth noting that none of the common GASP mutations (*rpoS*, *lrp*, or *ybeJ-gltJKL*) were  
446 identified in our *in vitro* evolution studies (**Table S1**). We considered that the enhanced  
447 growth of LasR<sup>-</sup> strains in post-exponential growth phases may be due to differences in

448 ppGpp signaling, given growth arrest as part of the stringent response modifies the  
449 expression of QS-regulated genes (van Delden, Comte, & Bally, 2001). However, no  
450 mutations in *relA* or *spoT*, the two ppGpp synthases, were observed. The mechanism of  
451 increased CbrB activity in  $\Delta$ *lasR* remains an unresolved question that is relevant to *P.*  
452 *aeruginosa* biology and may aid in the identification of the signals that activate the CbrA  
453 sensor kinase which influences clinically-relevant phenotypes including virulence and  
454 antibiotic resistance (Yeung et al., 2011). Our working model is that the upregulation of  
455 CbrB transcription of *crcZ* increases levels of transporters and catabolic enzymes due to  
456 the release from Crc repression, and this enhanced substrate uptake alters intracellular  
457 metabolite pools driving metabolism in accordance with Le Chatelier's principle (Monod,  
458 1949). Thus, quorum sensing mutants can maintain higher growth rates at lower  
459 substrate concentrations than for quorum-sensing intact cells.

460         The repeated observation that *lasR* loss-of-function mutations readily arise in  
461 diverse settings provokes the question of how quorum sensing is maintained. Several  
462 elegant mechanisms that address this point have been described. First, the wiring of the  
463 LasR regulon is such that while there are growth advantages on many substrates  
464 present in the lung, there are growth disadvantages on other important nutrient sources  
465 (e.g. adenosine and proteins and peptides (Heurlier et al., 2005)). Social cheating can  
466 promote the rise of *lasR* loss-of-function mutants in protease-requiring environments  
467 (Diggle et al., 2007; Hassett et al., 1999). Second, there are quorum sensing controlled  
468 “policing” mechanisms through which LasR<sup>+</sup> strains restrict the growth of LasR<sup>-</sup> types  
469 through the release of products toxic to quorum-sensing mutants (Castañeda-Tamez et  
470 al., 2018; Rodolfo García-Contreras et al., 2020; M. Wang et al., 2015). Lastly, there are

471 other tradeoffs such as sensitivity to oxidative stress that may limit LasR<sup>-</sup> lineage  
472 success (Hassett et al., 1999). Quorum sensing exerts metabolic control in other  
473 diverse microbes beyond *P. aeruginosa*. Thus, these data provide insight into  
474 generalizable explanations for the benefits of metabolic control in dense populations  
475 and indicate drivers for frequent loss-of-function mutations in quorum-sensing genes  
476 such *agr* mutations in *Staphylococcus aureus* and *hapR* mutations in *Vibrio cholerae*  
477 (Dallas L. Mould & Hogan, 2021).

478         Together, these data highlight the power of coupling *in vitro* evolution studies  
479 with forward and reverse genetic analyses. Other benefits to this approach include the  
480 ability to dissect subtle differences between pathway components. For example,  
481 multiple mutations in *crc* repeatedly rose in  $\Delta cbrA$ -, but not in  $\Delta cbrB$ -derived  
482 populations, and multiple mutations in *hfq* rose in  $\Delta cbrB$ -, and not in  $\Delta cbrA$ -derived  
483 populations. While CbrA and B work together as do Crc and Hfq, these observations  
484 may provide a foothold into key distinctions that could yield mechanistic insights. In the  
485 future, the ability for deep sequencing of infection populations and analysis of  
486 evolutionary trajectories may aid diagnoses and treatment decisions in beneficial ways.  
487

## 488 **Methods**

### 489 **Strain Construction and Maintenance**

490 In-frame deletions and complementation constructs were made using a *Saccharomyces*  
491 *cerevisiae* recombination technique described previously (Shanks, Caiazza, Hinsa,  
492 Toutain, & O'Toole, 2006). The *cbrB* and *crcZ* expression vectors were constructed by  
493 HiFi Gibson assembly according to manufacturer's protocol. All plasmids were

494 sequenced at the Molecular Biology Core at the Geisel School of Medicine at  
495 Dartmouth. In frame-deletion and complementation constructs were introduced into *P.*  
496 *aeruginosa* by conjugation via S17/lambda pir *E. coli*. Merodiploids were selected by  
497 drug resistance and double recombinants were obtained using sucrose counter-  
498 selection and genotype screening by PCR. Expression vectors were introduced into *P.*  
499 *aeruginosa* by electroporation and drug selection. All  
500 strains used in this study are listed in **Table S6**. Bacteria were maintained on lysogeny  
501 broth (LB) with 1.5% agar. Yeast strains for cloning were maintained on YPD (yeast  
502 extract-peptone-dextrose) with 2% agar. Artificial sputum medium (ASM) was made as  
503 described previously (Clay et al., 2020).

504

### 505 **Mathematical Model**

506 Growth parameters were determined from 5 mL grown LB cultures inoculated as  
507 described in the experimental evolution protocol. Using a plate reader, the density  
508 ( $OD_{600\text{ nm}}$ ) was measured by taking a 100  $\mu\text{L}$  aliquot at the designated time intervals  
509 with 1:10 dilutions for values greater than one. Lag and growth rate were measured in  
510 separate experiments from those used to monitor lysis. See extended note on  
511 mathematical model and Matlab script for additional details.

512

### 513 **Experimental Evolution**

514 Experimental evolution was modeled after work by Heurlier et al. (Heurlier et al., 2005).  
515 A single colony of each strain was used to inoculate a 5 mL LB culture in 13 mm  
516 borosilicate tubes. The tubes inoculated with a single colony were grown for 24 h at 37

517 °C on a roller drum. The 24 h grown culture was adjusted to  $OD_{600\text{ nm}} = 1$  based on  
518  $OD_{600\text{ nm}}$  reading of a 1 to 10 dilution in LB of the 24 h culture in a 1 cm cuvette using a  
519 Spectronic GENESYS 6 spectrophotometer. Separate 250  $\mu\text{L}$  aliquots of the  $OD_{600\text{ nm}}$   
520 normalized cells was sub-cultured into three tubes containing 5 mL fresh media to  
521 initiate the evolution experiment (i.e. time 0) with three distinct replicate cultures per  
522 experiment. At time of passage every two days, 25  $\mu\text{L}$  of culture was transferred into 5  
523 mL fresh media. Every day (or as indicated) cultures were diluted and bead spread onto  
524 LB agar plates for phenotype distinction. The LB agar plates were incubated for ~24 h at  
525 37°C and then left at room temperature for phenotype development. The sheen  $\text{LasR}^-$   
526 colony morphologies were counted, and the percentage calculated based on total  
527 CFUs. All experimental evolutions in LB were repeated on at least three independent  
528 days with three replicates of each strain per experiment unless otherwise stated. The  
529 ASM and succinate amended medium evolutions were completed on two separate  
530 days. In the case of  $\Delta rhIR$  and  $\Delta anr$ , the three replicates were inoculated from three  
531 independent overnights. Data visualization and statistical analysis was performed in  
532 GraphPad Prism 9 (version 9.2.0).

533

#### 534 **gDNA extraction, Sequencing, SNP calling of Pool-Seq data**

535 Between 100 and 150 random colonies were scraped and pooled from the LB agar  
536 plates that were counted and used to measure the percent of colonies with  $\text{LasR}^-$   
537 phenotypes at days four and six from a representative WT-,  $\Delta crbA$ -, and  $\Delta cbrB$ -initiated  
538 evolution experiment. For plates containing a total of 100 - 150 colonies, all colonies on  
539 the plate were collected for a single pooled genomic DNA extraction. If more than 150



540 colonies were on a plate, the plate was divided equally, and all colonies in an arbitrary  
541 section were collected to ensure genomic DNA was extracted from a similar number of  
542 colonies for each sample. Scraped up cells were pelleted briefly in a 1.5 mL Eppendorf  
543 tube via a short spin, resuspended in 1 mL PBS, vortexed briefly, and gDNA was  
544 subsequently extracted from a 50  $\mu$ L aliquot of cell resuspension via the Master Pure  
545 Yeast DNA purification kit according to manufacturer's protocol with RNAase treatment.  
546 A 2.5  $\mu$ g aliquot was submitted for Illumina sequencing (1Gbp) at the Microbial Genome  
547 Sequencing (MiGs) Center on the NextSeq 2000 platform. The resulting forward and  
548 reverse reads were trimmed. Both forward and reverse read files were aligned and  
549 compared to the complete and annotated UCBPP-PA14 genome available on NCBI  
550 (accession GCF\_000014625.1) using the variant caller BreSeq (Deatherage & Barrick,  
551 2014) (version 0.35.4) with a 5% cutoff. Specifically, the following command was used:  
552 `breseq -r [reference file] [sample name]_fastq.gz [sample name]_fastq.gz -o [output file`  
553 `name]`. This provided an output file that specified variations from the reference genome  
554 and listed their respective fractions of the total reads. These fractions were treated as  
555 estimations of genotype proportions in the population. Variants at fixation (100%) across  
556 all 18 samples (three strains, two days) were excluded from follow-up analysis as  
557 potential differences in strain background that differed from the reference genome at the  
558 start of the experiment. All sequencing data is available on the Sequence Read Archive  
559 with accession number PRJNA786588 upon publication.

560

561 **Milk Proteolysis**

562 Brain Heart Infusion Agar was supplemented with powdered milk dissolved in water to a  
563 final concentration of 5%. The evolved isolates selected on basis of “sheen” colony  
564 morphology were grown in a 96-well plate with 200  $\mu$ L LB per well for 16 h. Milk plates  
565 were inoculated with  $\sim$ 5  $\mu$ L of culture using a sterilized metal multiprong inoculation  
566 device (Dan-Kar) and incubated at 37°C for 16 h. PA14 WT and  $\Delta$ *lasR* strains were  
567 included as controls. Colonies which showed a halo of clearing larger than the  $\Delta$ *lasR*  
568 control strain were considered protease positive.

569

### 570 **Acyl Homoserine Lactone Autoinducer Bioreporter Assays**

571 Protocol as described in (D. L. Mould et al., 2020). Briefly, 100  $\mu$ L of OD<sub>600 nm</sub>  
572 normalized LB overnight cultures (OD<sub>600 nm</sub> = 0.01) of the AHL-synthesis deficient  
573 reporter strains DH161 (3OC12HSL-specific) or DH162 (3OC12HSL or C4HSL  
574 responsive) with AHL-responsive promoters to *lacZ* (Whiteley & Greenberg, 2001;  
575 Whiteley, Lee, & Greenberg, 1999) were bead spread on LB plates containing 150  
576  $\mu$ g/mL 5-bromo-4-chloro-3-indolyl- $\beta$ -D-galactopyranoside (XGAL, dissolved in DMSO).  
577 Inoculated plates were allowed to dry 10 min in a sterile hood. Once dry, 5  $\mu$ L of either  
578 the test strains or control cultures (PA14 wild type and  $\Delta$ *lasR* strains) were spotted onto  
579 the inoculated reporter lawns. After the spots dried, plates were incubated at 37°C for  
580 16 h then stored at 4°C to allow for further color development, if necessary, based on  
581 wild-type colony activity. The blue halo that formed around the colony was interpreted  
582 as AHL activity. The levels of AHL produced are approximated by the size of the blue  
583 halo formed around the colony.

584

## 585 **Competition Assays**

586 Competition assays were performed by competing strains against an *att::lacZ* strain as  
587 previously reported (Clay et al., 2020). Overnight cultures of *att::lacZ* competitor and  
588 test strains were normalized to  $OD_{600\text{ nm}} = 1$  and mixed in the designated ratios with  
589 either a wild type control or  $\Delta lasR$  strain. Aliquots of  $10^{-6}$  dilutions of the initial mixed  
590 inoculums were immediately plated on LB plates containing 150  $\mu\text{g/mL}$  XGAL by  
591 spreading an aliquot of 25 - 50  $\mu\text{L}$  with sterilized glass beads. Roughly 100 - 200  
592 colonies were counted to determine the initial ratios of PA14 *att::lacZ* to  $\Delta lasR$  or the WT  
593 control strains by blue:white colony phenotype, respectively. To begin the competition  
594 experiment, a 250  $\mu\text{L}$  aliquot of each undiluted mixed inoculum was sub-cultured into 5  
595 mL fresh LB medium and incubated on a roller drum at 37°C for 6 h. After 6 h, the  
596 cultures were collected, diluted by  $10^{-6}$  in fresh liquid LB, and plated as previously  
597 stated for blue:white colony screening. The LB plates containing XGAL were incubated  
598 overnight at 37°C prior to counting. Competitions were repeated on three separate  
599 days.

600

## 601 **Kinase Mutant Evolution Screen**

602 Using an ethanol/flame sterilized metal multiprong inoculation device (Dan-Kar), the  
603 kinase mutant library (B. X. Wang et al., 2021) was inoculated into a 96-well plate with  
604 200  $\mu\text{L}$  LB per well for 24 h shaking at 37°C. The 24 h grown cultures were used to  
605 inoculate two 96-well plates with each kinase mutant (including PA14 WT control) in  
606 triplicate. These cultures were grown for 48 h upon which 2  $\mu\text{L}$  was transferred to new  
607 96 well plates with fresh 200  $\mu\text{L}$  LB liquid per well. Each day, the wells containing the

608 wild-type replicates were diluted by  $10^{-6}$  in fresh LB and 25  $\mu$ L was bead spread onto LB  
609 for phenotypic distinction based on sheen colony morphology. At day 14, when all  
610 wildtype replicates contained at least 50% LasR<sup>-</sup> phenotypes, all wells were diluted and  
611 plated as stated previously for determination of sheen colony morphology. A secondary  
612 screen in 5 mL LB (as described above) was initiated for those mutant strains which did  
613 not show any LasR<sup>-</sup> phenotypes across all three replicates. The Circos plot  
614 summarizing the screen data was generated using BioCircos (Cui et al., 2016) in R  
615 (version 4.0.2) and re-colored in Adobe Illustrator.

616

### 617 **Filtrate Toxicity**

618 Based on a protocol used previously (Abisado et al., 2021), strains were grown 16 h in  
619 LB (5 mL) on a roller drum at 37°C, centrifuged at 13K RPM for 10 min in 2 mL aliquots  
620 and the resulting supernatant was filter sterilized through a 0.22  $\mu$ m pore filter. Per 5 mL  
621 filtrate, 250  $\mu$ L of fresh LB was added. A 16 h grown LB culture (5 mL) of PA14  $\Delta$ lasR  
622 was normalized to an OD<sub>600 nm</sub> = 1, and 250  $\mu$ L was used to inoculate 5 mL of the  
623 filtrate-LB mixture. The  $\Delta$ lasR cultures were grown for 24 h at 37°C on the roller drum  
624 upon which colony counts were determined by bead spreading an appropriate dilution  
625 on LB plates. Data visualization and statistical analysis were performed in GraphPad  
626 Prism 9 (version 9.2.0).

627

### 628 **Fluoroacetamide Sensitivity Assay**

629 Strains were inoculated (either by patching from plates or by spotting 5  $\mu$ L of 16 h LB  
630 grown culture) onto plates containing 1.5% agar with M63 salts, 10 mM lactamide, and

631 40 mM succinate with or without 2.5 mg/mL filter sterilized fluoroacetamide (FAA)  
632 dissolved in water based on protocol by Collier et al (Collier, Spence, Cox, & Phibbs,  
633 2001). Relative growth was compared in the presence and absence of FAA. PA14 wild  
634 type and  $\Delta crc$  were included as controls in every experiment wherein wild type displays  
635 robust growth on FAA in the presence of succinate and the  $\Delta crc$  strain, little to none.  
636

### 637 **Quantitative RT-PCR**

638 The indicated strains were grown from single colonies in 5 mL LB cultures on a roller  
639 drum for 16 h, normalized to an OD<sub>600 nm</sub> of 1 and 250  $\mu$ L of normalized culture was  
640 inoculated into 5 mL fresh LB for a starting inoculum around OD<sub>600 nm</sub> = 0.05. The  
641 cultures were then grown at 37°C on a roller drum until OD<sub>600 nm</sub> = 1 at which point a 1  
642 mL aliquot of culture was pelleted by centrifugation for 10 min at 13K RPM. Supernatant  
643 was removed and the cell pellets were flash frozen in an ethanol dry ice bath. This was  
644 repeated on three separate days with one WT and one  $\Delta lasR$  culture pair (n = 4)  
645 collected on each day or one  $\Delta lasR$  and one  $\Delta lasR\Delta cbrB$  culture pair (n = 3) each day.  
646 Pellets were stored at -80°C until all sets of pellets were collected. RNA was extracted  
647 using the QIAGEN RNeasy kit according to the manufacturer's protocol, and 7  $\mu$ g RNA  
648 was twice DNase treated with the Turbo DNA-free kit (Invitrogen). DNA contamination  
649 was checked by semi-quantitative PCR with gDNA standard for 35 cycles with *rpoD*  
650 qRT primers; if DNA contamination was greater than 0.004 ng /  $\mu$ L, the sample was  
651 DNase treated again. cDNA was synthesized from 400 ng of DNase-treated RNA using  
652 the RevertAid H Minus first-strand cDNA synthesis kit (Thermo Scientific), according to  
653 the manufacturer's instructions for random hexamer primer (IDT) and a GC-rich

654 template alongside an NRT control. Quantitative RT-PCR was performed on a CFX96  
655 real-time system (Bio-Rad), using SsoFast Evergreen supermix (Bio-Rad) according to  
656 the following program: 95°C for 30 s and 40 cycles of 95°C for 5 s and 60°C for 5 s  
657 followed by a melt curve with 65°C for 3 s up to 95°C in increments of 0.5°C. Transcripts  
658 were normalized to the average *rpoD* and *rspL* expression unless stated otherwise. *rspL*  
659 and *crcZ* primers as designed in (Xia et al., 2020). *rpoD* primers as designed in (Harty  
660 et al., 2019). Data visualization and statistical analysis performed in GraphPad Prism 9  
661 (version 9.2.0).

662

### 663 **Mono-carbon Growth**

664 Single carbon sources were supplemented into M63 base (Neidhardt, Bloch, & Smith,  
665 1974) and filter sterilized. A 16 h overnight LB culture grown at 37°C on a roller drum  
666 was normalized to an  $OD_{600\text{ nm}} = 1$  in 2 mL LB. For liquid growth curves, a 250  $\mu\text{L}$   
667 aliquot of the density adjusted culture was spiked into 5 mL fresh M63 medium with  
668 designated carbon source in triplicate and growth was monitored using a Spec20 hourly  
669 in 13 mm borosilicate tubes. Every point on the liquid growth heat maps is the average  
670 of 3 replicates per day, repeated 3 days total. For colony biofilm growth, 5  $\mu\text{L}$  of  $OD_{600}$   
671  $_{\text{nm}}$  normalized culture was inoculated onto 1.5% agar plate of M63 medium containing  
672 the designated carbon source in singlicate and grown for 16 h at 37°C. Colonies were  
673 cored using the back of a P1000 tip and disrupted by 5 min on Genie Disrupter in 1 mL  
674 LB. Disrupted colony biofilms were serially diluted. 5  $\mu\text{L}$  of the serial dilutions were  
675 plated and a 50  $\mu\text{L}$  aliquot of diluted colony resuspension ( $10^{-6}$  or  $10^{-7}$ -fold, depending  
676 on condition/strain) was bead spread and counted for colony forming units. Colony

677 biofilm growth was assessed on > 5 independent days. Data visualization and statistical  
678 analysis performed in GraphPad Prism 9 (version 9.2.0).

679

### 680 **Metabolomics of Bronchioloalveolar Lavage Fluid and Artificial Sputum Medium**

681 Human samples from people with and without cystic fibrosis were obtained with  
682 informed consent following institutional review board-approved protocols at Geisel  
683 School of Medicine at Dartmouth. The investigators were blinded to the conditions of the  
684 experiments during data collection and analysis. To obtain relative metabolite counts,  
685 bronchioloalveolar lavage (BAL) fluid samples were briefly centrifuged to exclude large  
686 debris then the supernatant was flash frozen in liquid nitrogen. Samples were processed  
687 by Metabolon via LC/MS for relative metabolite amounts. Raw values from Metabolon  
688 were normalized to protein concentrations by the BioRad Bradford protein concentration  
689 or raw area counts per day sample run and then the values were rescaled to set the  
690 median to 1. Missing values were imputed with the minimum rescaled value for that  
691 biochemical. Quantitative amino acid concentrations were determined for aliquots of the  
692 same BAL samples (lyophilized) using the Biocrates AbsoluteIDQ p180 kit at the Duke  
693 Proteomics Core Facility. The lyophilized samples of BAL were homogenized in water  
694 and 50/50 water/methanol respectively to extract metabolites. 25  $\mu$ L of the BAL extract  
695 were utilized for preparation of the samples on a Biocrates AbsoluteIDQ p180 plate. A  
696 Waters Xevo-TQ-S mass spectrometer was utilized to acquire targeted metabolite  
697 quantification on all samples and quality control specimens. Raw data (in  $\mu$ M) was  
698 exported independently for the FIA-MS/MS and UHPLC-MS/MS acquisition approaches  
699 used in this kit. The BAL sample data were corrected for the dilution factor since 25  $\mu$ L



700 was used versus 10  $\mu$ L of the standards that were used to calculate the quantitative  
701 calibration curve. Principal component analysis of log normalized counts or  
702 concentrations were performed in R (version 4.0.2) (Team, 2021) using the `prcomp()`  
703 function and visualized with `ggplot2` (Wickham, 2016) using `ggfortify` (Tang & Horikoshi,  
704 2016). Supplemental table of sample metadata compiled with `sjPlot` (Lüdecke, 2021) in  
705 R.

706

### 707 **BIOLOG Phenotyping assay**

708 Two mL of LB overnight cultures grown at 37°C on a roller drum were washed twice  
709 with M63 salts with no carbon source by repeated centrifugation (10 min, 13K RPM) and  
710 resuspension into fresh medium. The washed cultures were normalized to an  $OD_{600\text{ nm}}$   
711 = 0.05 in 25 mL of fresh M63 salts base and 100  $\mu$ L was used to resuspend dehydrated  
712 carbon sources on the bottom of PM1 and PM2 BIOLOG phenotype plates by repeated  
713 pipetting. Cells and resuspended carbon were transferred to a sterile flat bottom, black-  
714 walled 96 well plate and incubated at 37°C, static. Every hour  $OD_{600\text{ nm}}$  was monitored in  
715 a plate reader for 24 h. Endpoint (24h) data is reported. Data visualization and statistical  
716 analysis performed in GraphPad Prism 9 (version 9.2.0).

717

### 718 **Contact for reagents, data, resource sharing and code availability statement**

719 All data necessary for evaluation of the manuscript conclusions are available within the  
720 main text or supplementary materials. Further information and requests for resources  
721 and reagents should be directed to and will be fulfilled by the corresponding author. No  
722 custom code was used.

723

724 **Acknowledgements**

725 Research reported in this publication was supported by grants from the Cystic Fibrosis  
726 Foundation HOGAN19G0 (D.A.H.), ASHARE20P0 (A.A.) and STANTO19R0 (D.S.), and  
727 the National Institutes of Health (NIH) through T32AI007519 (D.L.M.), R01HL122372  
728 (A.A.) and P20 GM130454-02 (D.S.). Additional core facility support came from the NIH  
729 NIGMS P20GM113132 (BioMT) and NIDDK P30-DK117469 (Dartmouth Cystic Fibrosis  
730 Research Center) and STANTO19R0 from the Cystic Fibrosis Foundation. Plasmid  
731 sequencing was carried out at Geisel School of Medicine Genomics Shared Resource,  
732 which was established by equipment grants from the NIH and NSF and is supported in  
733 part by a Cancer Center Core Grant (P30CA023108) from the NIH National Cancer  
734 Institute. We would like to acknowledge Amy Conaway for assistance in the kinase  
735 evolution screen, Dr. Georgia Doing for LasR<sup>-</sup> colony enumeration in key experiments,  
736 and Dr. Nicholas Jacobs for constructive and thoughtful feedback on the written  
737 manuscript. The content is solely the responsibility of the authors and does not  
738 necessarily represent the official views of the NIH. The funders had no role in study  
739 design, data collection and analysis, decision to publish, or preparation of the  
740 manuscript.

741

742

743 Abisado, R. G., Kimbrough, J. H., McKee, B. M., Craddock, V. D., Smalley, N. E.,  
744 Dandekar, A. A., & Chandler, J. R. (2021). Tobramycin adaptation enhances  
745 policing of social cheaters in *Pseudomonas aeruginosa*. *Appl Environ Microbiol*,  
746 87(12), e0002921. doi:10.1128/aem.00029-21  
747 Barbieri, J. T., Delden, C. V., Pesci, E. C., Pearson, J. P., & Iglewski, B. H. (1998).  
748 Starvation selection restores elastase and rhamnolipid production in a

- 749 *Pseudomonas aeruginosa* quorum-sensing mutant. *Infection and Immunity*,  
750 66(9), 4499-4502. doi:doi:10.1128/IAI.66.9.4499-4502.1998
- 751 Basan, M., Honda, T., Christodoulou, D., Hörl, M., Chang, Y.-F., Leoncini, E.,  
752 Mukherjee, A., Okano, H., Taylor, B. R., Silverman, J. M., Sanchez, C.,  
753 Williamson, J. R., Paulsson, J., Hwa, T., & Sauer, U. (2020). A universal trade-off  
754 between growth and lag in fluctuating environments. *Nature*, 584(7821), 470-474.  
755 doi:10.1038/s41586-020-2505-4
- 756 Bensel, T., Stotz, M., Borneff-Lipp, M., Wollschläger, B., Wienke, A., Taccetti, G.,  
757 Campana, S., Meyer, K. C., Jensen, P., Lechner, U., Ulrich, M., Döring, G., &  
758 Worlitzsch, D. (2011). Lactate in cystic fibrosis sputum. *J Cyst Fibros*, 10(1), 37-  
759 44. doi:10.1016/j.jcf.2010.09.004
- 760 Boyle, K. E., Monaco, H. T., Deforet, M., Yan, J., Wang, Z., Rhee, K., & Xavier, J. B.  
761 (2017). Metabolism and the evolution of social behavior. *Molecular Biology and*  
762 *Evolution*, 34(9), 2367-2379. doi:10.1093/molbev/msx174
- 763 Castañeda-Tamez, P., Ramírez-Peris, J., Pérez-Velázquez, J., Kuttler, C.,  
764 Jalalimanesh, A., Saucedo-Mora, M. Á., Jiménez-Cortés, J. G., Maeda, T.,  
765 González, Y., Tomás, M., Wood, T. K., & García-Contreras, R. (2018). Pyocyanin  
766 restricts social cheating in *Pseudomonas aeruginosa*. *Frontiers in Microbiology*,  
767 9(1348). doi:10.3389/fmicb.2018.01348
- 768 Chen, R., Déziel, E., Groleau, M.-C., Schaefer, A. L., & Greenberg, E. P. (2019). Social  
769 cheating in a *Pseudomonas aeruginosa* quorum-sensing variant. *Proceedings of*  
770 *the National Academy of Sciences*, 116(14), 7021-7026.  
771 doi:10.1073/pnas.1819801116
- 772 Clay, M. E., Hammond, J. H., Zhong, F., Chen, X., Kowalski, C. H., Lee, A. J., Porter,  
773 M. S., Hampton, T. H., Greene, C. S., Pletneva, E. V., & Hogan, D. A. (2020).  
774 *Pseudomonas aeruginosa lasR* mutant fitness in microoxia is supported by an  
775 Anr-regulated oxygen-binding hemerythrin. *Proceedings of the National Academy*  
776 *of Sciences*, 117(6), 3167-3173. doi:10.1073/pnas.1917576117
- 777 Collier, D. N., Spence, C., Cox, M. J., & Phibbs, P. V. (2001). Isolation and phenotypic  
778 characterization of *Pseudomonas aeruginosa* pseudorevertants containing  
779 suppressors of the catabolite repression control-defective *crc-10* allele. *FEMS*  
780 *Microbiology Letters*, 196(2), 87-92. doi:10.1111/j.1574-6968.2001.tb10546.x
- 781 Crocker, A. W., Harty, C. E., Hammond, J. H., Willger, S. D., Salazar, P., Botelho, N. J.,  
782 Jacobs, N. J., & Hogan, D. A. (2019). *Pseudomonas aeruginosa* ethanol  
783 oxidation by AdhA in low-oxygen environments. *J Bacteriol*, 201(23).  
784 doi:10.1128/JB.00393-19
- 785 Cui, Y., Chen, X., Luo, H., Fan, Z., Luo, J., He, S., Yue, H., Zhang, P., & Chen, R.  
786 (2016). BioCircos.js: an interactive Circos JavaScript library for biological data  
787 visualization on web applications. *Bioinformatics*, 32(11), 1740-1742.  
788 doi:10.1093/bioinformatics/btw041
- 789 D'Argenio, D. A., Wu, M., Hoffman, L. R., Kulasekara, H. D., Deziel, E., Smith, E. E.,  
790 Nguyen, H., Ernst, R. K., Larson Freeman, T. J., Spencer, D. H., Brittnacher, M.,  
791 Hayden, H. S., Selgrade, S., Klausen, M., Goodlett, D. R., Burns, J. L., Ramsey,  
792 B. W., & Miller, S. I. (2007). Growth phenotypes of *Pseudomonas aeruginosa*  
793 *lasR* mutants adapted to the airways of cystic fibrosis patients. *Mol Microbiol*,  
794 64(2), 512-533. doi:10.1111/j.1365-2958.2007.05678.x

- 795 D'Argenio, D. A., Wu, M., Hoffman, L. R., Kulasekara, H. D., Déziel, E., Smith, E. E.,  
796 Nguyen, H., Ernst, R. K., Larson Freeman, T. J., Spencer, D. H., Brittnacher, M.,  
797 Hayden, H. S., Selgrade, S., Klausen, M., Goodlett, D. R., Burns, J. L., Ramsey,  
798 B. W., & Miller, S. I. (2007). Growth phenotypes of *Pseudomonas aeruginosa*  
799 *lasR* mutants adapted to the airways of cystic fibrosis patients. *Mol Microbiol*,  
800 *64*(2), 512-533. doi:10.1111/j.1365-2958.2007.05678.x
- 801 Deatherage, D. E., & Barrick, J. E. (2014). Identification of mutations in laboratory-  
802 evolved microbes from next-generation sequencing data using breseq. *Methods*  
803 *in molecular biology (Clifton, N.J.)*, *1151*, 165-188. doi:10.1007/978-1-4939-  
804 0554-6\_12
- 805 Dettman, J. R., Sztepanacz, J. L., & Kassen, R. (2016). The properties of spontaneous  
806 mutations in the opportunistic pathogen *Pseudomonas aeruginosa*. *BMC*  
807 *Genomics*, *17*, 27-27. doi:10.1186/s12864-015-2244-3
- 808 Diggle, S. P., Griffin, A. S., Campbell, G. S., & West, S. A. (2007). Cooperation and  
809 conflict in quorum-sensing bacterial populations. *Nature*, *450*(7168), 411-414.  
810 doi:10.1038/nature06279
- 811 Esther, C. R., Jr., Alexis, N. E., Clas, M. L., Lazarowski, E. R., Donaldson, S. H.,  
812 Ribeiro, C. M., Moore, C. G., Davis, S. D., & Boucher, R. C. (2008). Extracellular  
813 purines are biomarkers of neutrophilic airway inflammation. *Eur Respir J*, *31*(5),  
814 949-956. doi:10.1183/09031936.00089807
- 815 Esther, C. R., Jr., Turkovic, L., Rosenow, T., Muhlebach, M. S., Boucher, R. C.,  
816 Ranganathan, S., & Stick, S. M. (2016). Metabolomic biomarkers predictive of  
817 early structural lung disease in cystic fibrosis. *Eur Respir J*, *48*(6), 1612-1621.  
818 doi:10.1183/13993003.00524-2016
- 819 Farrell, M. J., & Finkel, S. E. (2003). The growth advantage in stationary-phase  
820 phenotype conferred by *rpoS* mutations is dependent on the pH and nutrient  
821 environment. *Journal of Bacteriology*, *185*(24), 7044-7052.  
822 doi:10.1128/JB.185.24.7044-7052.2003
- 823 Feltner, J. B., Wolter, D. J., Pope, C. E., Groleau, M.-C., Smalley, N. E., Greenberg, E.  
824 P., Mayer-Hamblett, N., Burns, J., Déziel, E., Hoffman, L. R., Dandekar, A. A.,  
825 Winans, S. C., Diggle, S., & Goldberg, J. (2016). LasR variant cystic fibrosis  
826 isolates reveal an adaptable quorum-sensing hierarchy in *Pseudomonas*  
827 *aeruginosa*. *mBio*, *7*(5), e01513-01516. doi:doi:10.1128/mBio.01513-16
- 828 Finkel, S. E., & Kolter, R. (1999). Evolution of microbial diversity during prolonged  
829 starvation. *Proceedings of the National Academy of Sciences of the United*  
830 *States of America*, *96*(7), 4023-4027. doi:10.1073/pnas.96.7.4023
- 831 Fitzpatrick, A. M., Park, Y., Brown, L. A., & Jones, D. P. (2014). Children with severe  
832 asthma have unique oxidative stress-associated metabolomic profiles. *J Allergy*  
833 *Clin Immunol*, *133*(1), 258-261.e251-258. doi:10.1016/j.jaci.2013.10.012
- 834 García-Contreras, R., & Loarca, D. (2020). The bright side of social cheaters: potential  
835 beneficial roles of "social cheaters" in microbial communities. *FEMS Microbiol*  
836 *Ecol*, *97*(1). doi:10.1093/femsec/fiaa239
- 837 García-Contreras, R., Loarca, D., Pérez-González, C., Jiménez-Cortés, J. G.,  
838 Gonzalez-Valdez, A., & Soberón-Chávez, G. (2020). Rhamnolipids stabilize  
839 quorum sensing mediated cooperation in *Pseudomonas aeruginosa*. *FEMS*  
840 *Microbiology Letters*, *367*(10). doi:10.1093/femsle/fnaa080

- 841 Groleau, M.-C., Taillefer, H., Vincent, A. T., Constant, P., & Déziel, E. *Pseudomonas*  
842 *aeruginosa* isolates defective in function of the LasR quorum sensing regulator  
843 are frequent in diverse environmental niches. *Environmental Microbiology*(n/a).  
844 doi:<https://doi.org/10.1111/1462-2920.15745>
- 845 Hammond, J. H., Hebert, W. P., Naimie, A., Ray, K., Gelder, R. D. V., DiGiandomenico,  
846 A., Lalitha, P., Srinivasan, M., Acharya, N. R., Lietman, T., Hogan, D. A., Zegans,  
847 M. E., & Blokesch, M. (2016). Environmentally endemic *Pseudomonas*  
848 *aeruginosa* strains with mutations in *lasR* are associated with increased disease  
849 severity in corneal ulcers. *mSphere*, 1(5), e00140-00116.  
850 doi:doi:10.1128/mSphere.00140-16
- 851 Harty, C. E., Martins, D., Doing, G., Mould, D. L., Clay, M. E., Occhipinti, P., Nguyen,  
852 D., & Hogan, D. A. (2019). Ethanol stimulates trehalose production through a  
853 SpoT-DksA-AlgU-Dependent pathway in *Pseudomonas aeruginosa*. *Journal of*  
854 *Bacteriology*, 201(12), e00794-00718. doi:10.1128/JB.00794-18
- 855 Hassett, D. J., Ma, J.-F., Elkins, J. G., McDermott, T. R., Ochsner, U. A., West, S. E. H.,  
856 Huang, C.-T., Fredericks, J., Burnett, S., Stewart, P. S., McFeters, G., Passador,  
857 L., & Iglewski, B. H. (1999). Quorum sensing in *Pseudomonas aeruginosa*  
858 controls expression of catalase and superoxide dismutase genes and mediates  
859 biofilm susceptibility to hydrogen peroxide. *Molecular Microbiology*, 34(5), 1082-  
860 1093. doi:<https://doi.org/10.1046/j.1365-2958.1999.01672.x>
- 861 Heurlier, K., Denervaud, V., Haenni, M., Guy, L., Krishnapillai, V., & Haas, D. (2005).  
862 Quorum-sensing-negative (*lasR*) mutants of *Pseudomonas aeruginosa* avoid cell  
863 lysis and death. *J Bacteriol*, 187(14), 4875-4883. doi:10.1128/JB.187.14.4875-  
864 4883.2005
- 865 Hoffman, L. R., Kulasekara, H. D., Emerson, J., Houston, L. S., Burns, J. L., Ramsey, B.  
866 W., & Miller, S. I. (2009). *Pseudomonas aeruginosa lasR* mutants are associated  
867 with cystic fibrosis lung disease progression. *Journal of Cystic Fibrosis*, 8(1), 66-  
868 70. doi:<https://doi.org/10.1016/j.jcf.2008.09.006>
- 869 Jørgensen, K. M., Wassermann, T., Johansen, H. K., Christiansen, L. E., Molin, S.,  
870 Høiby, N., & Ciofu, O. (2015). Diversity of metabolic profiles of cystic fibrosis  
871 *Pseudomonas aeruginosa* during the early stages of lung infection. *Microbiology*,  
872 161(7), 1447-1462. doi:<https://doi.org/10.1099/mic.0.000093>
- 873 La Rosa, R., Johansen, H. K., & Molin, S. (2018). Convergent metabolic specialization  
874 through distinct evolutionary paths in *Pseudomonas aeruginosa*. *mBio*, 9(2),  
875 e00269-00218. doi:10.1128/mBio.00269-18
- 876 La Rosa, R., Johansen, H. K., & Molin, S. (2019). Adapting to the airways: metabolic  
877 requirements of *Pseudomonas aeruginosa* during the infection of cystic fibrosis  
878 patients. *Metabolites*, 9(10), 234. doi:10.3390/metabo9100234
- 879 LaFayette, S. L., Houle, D., Beaudoin, T., Wojewodka, G., Radzioch, D., Hoffman, L. R.,  
880 Burns, J. L., Dandekar, A. A., Smalley, N. E., Chandler, J. R., Zlosnik, J. E.,  
881 Speert, D. P., Bernier, J., Matouk, E., Brochiero, E., Rousseau, S., & Nguyen, D.  
882 (2015). Cystic fibrosis-adapted *Pseudomonas aeruginosa* quorum sensing *lasR*  
883 mutants cause hyperinflammatory responses. *Science advances*, 1(6),  
884 e1500199. doi:10.1126/sciadv.1500199
- 885 Lorenz, A., Preuß, M., Bruchmann, S., Pawar, V., Grahl, N., Pils, M. C., Nolan, L. M.,  
886 Filloux, A., Weiss, S., & Häussler, S. (2019). Importance of flagella in acute and



- 887 chronic *Pseudomonas aeruginosa* infections. *Environ Microbiol*, 21(3), 883-897.  
888 doi:10.1111/1462-2920.14468
- 889 Lüdecke, D. (2021). sjPlot: Data Visualization for Statistics in Social  
890 Science (Version R package version 2.8.10). Retrieved from [https://CRAN.R-](https://CRAN.R-project.org/package=sjPlot)  
891 [project.org/package=sjPlot](https://CRAN.R-project.org/package=sjPlot)
- 892 Lujan, A. M., Moyano, A. J., Segura, I., Argarana, C. E., & Smania, A. M. (2007).  
893 Quorum-sensing-deficient (*lasR*) mutants emerge at high frequency from a  
894 *Pseudomonas aeruginosa mutS* strain. *Microbiology (Reading)*, 153(Pt 1), 225-  
895 237. doi:10.1099/mic.0.29021-0
- 896 McCreedy, A. R., Paczkowski, J. E., Henke, B. R., & Bassler, B. L. (2019). Structural  
897 determinants driving homoserine lactone ligand selection in the *Pseudomonas*  
898 *aeruginosa* LasR quorum-sensing receptor. *Proceedings of the National*  
899 *Academy of Sciences*, 116(1), 245-254. doi:10.1073/pnas.1817239116
- 900 Monod, J. (1949). The growth of bacterial cultures. *Annual Review of Microbiology*, 3(1),  
901 371-394. doi:10.1146/annurev.mi.03.100149.002103
- 902 Mould, D. L., Botelho, N. J., & Hogan, D. A. (2020). Intraspecies signaling between  
903 common variants of *Pseudomonas aeruginosa* increases production of quorum-  
904 sensing-controlled virulence factors. *mBio*, 11(4). doi:10.1128/mBio.01865-20
- 905 Mould, D. L., & Hogan, D. A. (2021). Intraspecies heterogeneity in microbial  
906 interactions. *Current Opinion in Microbiology*, 62, 14-20.  
907 doi:<https://doi.org/10.1016/j.mib.2021.04.003>
- 908 Neidhardt, F. C., Bloch, P. L., & Smith, D. F. (1974). Culture medium for enterobacteria.  
909 *J Bacteriol*, 119(3), 736-747. Retrieved from  
910 [http://www.ncbi.nlm.nih.gov/entrez/query.fcgi?cmd=Retrieve&db=PubMed&dopt=](http://www.ncbi.nlm.nih.gov/entrez/query.fcgi?cmd=Retrieve&db=PubMed&dopt=Citation&list_uids=4604283)  
911 [Citation&list\\_uids=4604283](http://www.ncbi.nlm.nih.gov/entrez/query.fcgi?cmd=Retrieve&db=PubMed&dopt=Citation&list_uids=4604283)
- 912 O'Toole, G. A., Gibbs, K. A., Hager, P. W., Phibbs, P. V., & Kolter, R. (2000). The global  
913 carbon metabolism regulator Crc is a component of a signal transduction  
914 pathway required for biofilm development by *Pseudomonas aeruginosa*. *Journal*  
915 *of Bacteriology*, 182(2), 425-431. doi:10.1128/JB.182.2.425-431.2000
- 916 O'Connor, K., Zhao, C. Y., & Diggle, S. P. (2021). Frequency of quorum sensing  
917 mutations in *Pseudomonas aeruginosa* strains isolated from different  
918 environments. *bioRxiv*, 2021.2002.2022.432365. doi:10.1101/2021.02.22.432365
- 919 Özkaya, Ö., Balbontín, R., Gordo, I., & Xavier, K. B. (2018). Cheating on cheaters  
920 stabilizes cooperation in *Pseudomonas aeruginosa*. *Curr Biol*, 28(13), 2070-  
921 2080.e2076. doi:10.1016/j.cub.2018.04.093
- 922 Palmer, K. L., Mashburn, L. M., Singh, P. K., & Whiteley, M. (2005). Cystic fibrosis  
923 sputum supports growth and cues key aspects of *Pseudomonas aeruginosa*  
924 physiology. *J Bacteriol*, 187(15), 5267-5277. doi:10.1128/jb.187.15.5267-  
925 5277.2005
- 926 Qi, Q., Toll-Riera, M., Heilbron, K., Preston, G. M., & MacLean, R. C. (2016). The  
927 genomic basis of adaptation to the fitness cost of rifampicin resistance in  
928 *Pseudomonas aeruginosa*. *Proc Biol Sci*, 283(1822). doi:10.1098/rspb.2015.2452
- 929 Rodrigue, A., Quentin, Y., Lazdunski, A., Méjean, V., & Foglino, M. (2000). Two-  
930 component systems in *Pseudomonas aeruginosa*: why so many? *Trends*  
931 *Microbiol*, 8(11), 498-504. doi:10.1016/s0966-842x(00)01833-3

- 932 Rumbaugh, K. P., Diggle, S. P., Watters, C. M., Ross-Gillespie, A., Griffin, A. S., &  
933 West, S. A. (2009). Quorum sensing and the social evolution of bacterial  
934 virulence. *Curr Biol*, 19(4), 341-345. doi:10.1016/j.cub.2009.01.050
- 935 Sandoz, K. M., Mitzimberg, S. M., & Schuster, M. (2007). Social cheating in  
936 *Pseudomonas aeruginosa* quorum sensing. *Proceedings of the National*  
937 *Academy of Sciences*, 104(40), 15876-15881. doi:10.1073/pnas.0705653104
- 938 Schuster, M., & Greenberg, E. P. (2007). Early activation of quorum sensing in  
939 *Pseudomonas aeruginosa* reveals the architecture of a complex regulon. *BMC*  
940 *Genomics*, 8(1), 287. doi:10.1186/1471-2164-8-287
- 941 Schuster, M., Lostroh, C. P., Ogi, T., & Greenberg, E. P. (2003). Identification, timing,  
942 and signal specificity of *Pseudomonas aeruginosa* quorum-controlled Genes: a  
943 transcriptome analysis. *Journal of Bacteriology*, 185(7), 2066-2079.  
944 doi:doi:10.1128/JB.185.7.2066-2079.2003
- 945 Shanks, R. M., Caiazza, N. C., Hinsa, S. M., Toutain, C. M., & O'Toole, G. A. (2006).  
946 *Saccharomyces cerevisiae*-based molecular tool kit for manipulation of genes  
947 from gram-negative bacteria. *Appl Environ Microbiol*, 72(7), 5027-5036.  
948 Retrieved from  
949 [http://www.ncbi.nlm.nih.gov/entrez/query.fcgi?cmd=Retrieve&db=PubMed&dopt=](http://www.ncbi.nlm.nih.gov/entrez/query.fcgi?cmd=Retrieve&db=PubMed&dopt=Citation&list_uids=16820502)  
950 [Citation&list\\_uids=16820502](http://www.ncbi.nlm.nih.gov/entrez/query.fcgi?cmd=Retrieve&db=PubMed&dopt=Citation&list_uids=16820502)
- 951 Smith, E. E., Buckley, D. G., Wu, Z., Saenphimmachak, C., Hoffman, L. R., D'Argenio,  
952 D. A., Miller, S. I., Ramsey, B. W., Speert, D. P., Moskowitz, S. M., Burns, J. L.,  
953 Kaul, R., & Olson, M. V. (2006). Genetic adaptation by *Pseudomonas aeruginosa*  
954 to the airways of cystic fibrosis patients. *Proceedings of the National Academy of*  
955 *Sciences of the United States of America*, 103(22), 8487-8492.  
956 doi:10.1073/pnas.0602138103
- 957 Sonnleitner, E., Abdou, L., & Haas, D. (2009). Small RNA as global regulator of carbon  
958 catabolite repression in *Pseudomonas aeruginosa*. *Proceedings of the National*  
959 *Academy of Sciences of the United States of America*, 106(51), 21866-21871.  
960 doi:10.1073/pnas.pnas.0910308106
- 961 Sonnleitner, E., Prindl, K., & Bläsi, U. (2017). The *Pseudomonas aeruginosa* CrcZ RNA  
962 interferes with Hfq-mediated riboregulation. *PloS one*, 12(7), e0180887-  
963 e0180887. doi:10.1371/journal.pone.0180887
- 964 Tang, Y., & Horikoshi, M. (2016). ggfortify: Unified Interface to Visualize Statistical  
965 Results of Popular R Packages. *The R Journal*, 8, 478-489. doi:10.32614/RJ-  
966 2016-060
- 967 Team, R. C. (2021). R: A language and environment for statistical computing. Vienna,  
968 Austria. Retrieved from <https://www.R-project.org/>
- 969 Twomey, K. B., Alston, M., An, S. Q., O'Connell, O. J., McCarthy, Y., Swarbreck, D.,  
970 Febrer, M., Dow, J. M., Plant, B. J., & Ryan, R. P. (2013). Microbiota and  
971 metabolite profiling reveal specific alterations in bacterial community structure  
972 and environment in the cystic fibrosis airway during exacerbation. *PloS one*,  
973 8(12), e82432. doi:10.1371/journal.pone.0082432
- 974 van Delden, C., Comte, R., & Bally, A. M. (2001). Stringent response activates quorum  
975 sensing and modulates cell density-dependent gene expression in *Pseudomonas*  
976 *aeruginosa*. *J Bacteriol*, 183(18), 5376-5384. doi:10.1128/jb.183.18.5376-  
977 5384.2001



- 978 Wang, B. X., Cady, K. C., Oyarce, G. C., Ribbeck, K., & Laub, M. T. (2021). Two-  
979 component signaling systems regulate diverse virulence-associated traits in  
980 *Pseudomonas aeruginosa*. *Appl Environ Microbiol*, 87(11).  
981 doi:10.1128/aem.03089-20
- 982 Wang, M., Schaefer, A. L., Dandekar, A. A., & Greenberg, E. P. (2015). Quorum  
983 sensing and policing of *Pseudomonas aeruginosa* social cheaters. *Proceedings*  
984 *of the National Academy of Sciences*, 112(7), 2187-2191.  
985 doi:10.1073/pnas.1500704112
- 986 West, S. A., Griffin, A. S., Gardner, A., & Diggle, S. P. (2006). Social evolution theory for  
987 microorganisms. *Nature Reviews Microbiology*, 4(8), 597-607.  
988 doi:10.1038/nrmicro1461
- 989 Whiteley, M., & Greenberg, E. P. (2001). Promoter specificity elements in *Pseudomonas*  
990 *aeruginosa* quorum-sensing-controlled genes. *Journal of Bacteriology*, 183(19),  
991 5529-5534. doi:doi:10.1128/JB.183.19.5529-5534.2001
- 992 Whiteley, M., Lee, K. M., & Greenberg, E. P. (1999). Identification of genes controlled  
993 by quorum sensing in *Pseudomonas aeruginosa*. *Proceedings of the National*  
994 *Academy of Sciences*, 96(24), 13904-13909. doi:10.1073/pnas.96.24.13904
- 995 Wickham, H. (2016). ggplot2: Elegant Graphics for Data Analysis. In: Springer-Verlag.
- 996 Winstanley, C., O'Brien, S., & Brockhurst, M. A. (2016). *Pseudomonas aeruginosa*  
997 evolutionary adaptation and diversification in cystic fibrosis chronic lung  
998 infections. *Trends Microbiol*, 24(5), 327-337. doi:10.1016/j.tim.2016.01.008
- 999 Xia, Y., Wang, D., Pan, X., Xia, B., Weng, Y., Long, Y., Ren, H., Zhou, J., Jin, Y., Bai,  
1000 F., Cheng, Z., Jin, S., Wu, W., Guillard, T., & Pier, G. B. (2020). TpiA is a key  
1001 metabolic enzyme that affects virulence and resistance to aminoglycoside  
1002 antibiotics through CrcZ in *Pseudomonas aeruginosa*. *mBio*, 11(1), e02079-  
1003 02019. doi:doi:10.1128/mBio.02079-19
- 1004 Yan, H., Wang, M., Sun, F., Dandekar, A. A., Shen, D., & Li, N. (2018). A metabolic  
1005 trade-off modulates policing of social cheaters in populations of *Pseudomonas*  
1006 *aeruginosa*. *Frontiers in Microbiology*, 9(337). doi:10.3389/fmicb.2018.00337
- 1007 Yang, L., Haagensen, J. A. J., Jelsbak, L., Johansen, H. K., Sternberg, C., Høiby, N., &  
1008 Molin, S. (2008). *In situ* growth rates and biofilm development of *Pseudomonas*  
1009 *aeruginosa* populations in chronic lung infections. *Journal of Bacteriology*,  
1010 190(8), 2767-2776. doi:doi:10.1128/JB.01581-07
- 1011 Yeung, A. T. Y., Bains, M., & Hancock, R. E. W. (2011). The sensor kinase CbrA is a  
1012 global regulator that modulates metabolism, virulence, and antibiotic resistance  
1013 in *Pseudomonas aeruginosa*. *Journal of Bacteriology*, 193(4), 918-931.  
1014 doi:doi:10.1128/JB.00911-10
- 1015 Zambrano, M. M., Siegele, D. A., Almirón, M., Tormo, A., & Kolter, R. (1993). Microbial  
1016 competition: *Escherichia coli* mutants that take over stationary phase cultures.  
1017 *Science*, 259(5102), 1757-1760. doi:10.1126/science.7681219
- 1018 Zinser, E. R., & Kolter, R. (1999). Mutations enhancing amino acid catabolism confer a  
1019 growth advantage in stationary phase. *J Bacteriol*, 181(18), 5800-5807.  
1020 doi:10.1128/jb.181.18.5800-5807.1999
- 1021 Zinser, E. R., & Kolter, R. (2000). Prolonged stationary-phase incubation selects for *lrp*  
1022 mutations in *Escherichia coli* K-12. *J Bacteriol*, 182(15), 4361-4365.  
1023 doi:10.1128/jb.182.15.4361-4365.2000

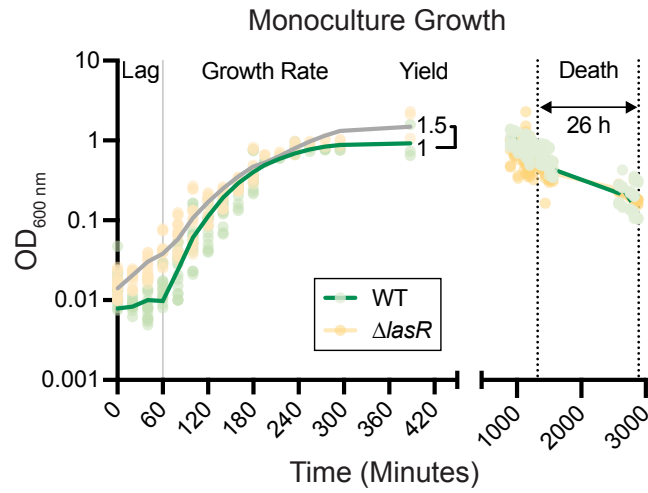

**Supplemental Figure 1. Experimentally determined growth parameters of PA14 wild type and  $\Delta lasR$  monocultures in LB.** Density measurements of strains PA14 wild type (WT, green) and  $\Delta lasR$  (beige, grey) monocultures over time. Lag, growth rate, yield, duration of death, and death rate were determined for use in the mathematical model (Fig. 1A).

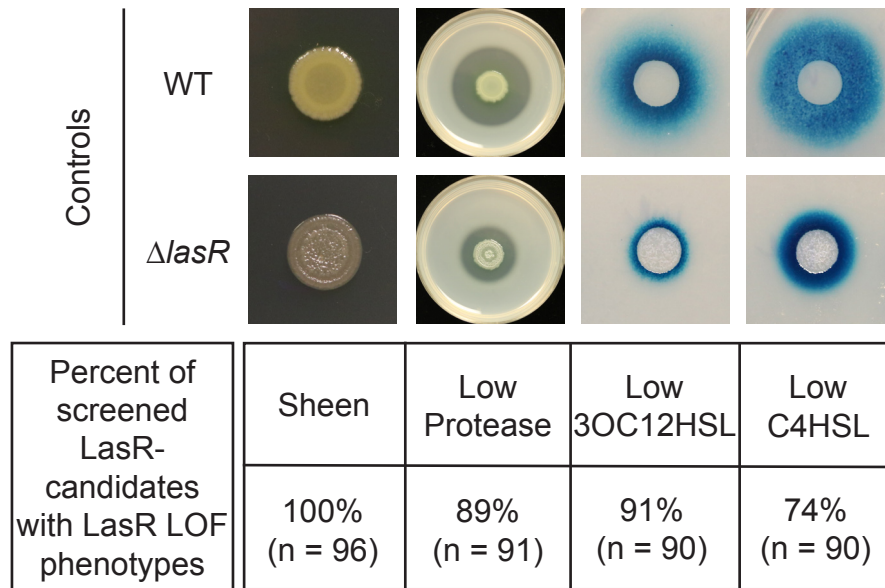

**Supplemental Figure 2. Phenotype analysis of sheen LasR- candidates isolated from the evolution experiments in LB.** LasR loss-of-function (LOF) candidates picked on basis of sheen colony morphology from evolution were screened for phenotypes associated with LasR- strains including low protease activity on milk plates and low levels of acyl homoserine lactone production as measured by  $\Delta lasR/\Delta rhII$  bioreporters responsive to LasR-regulated autoinducer 3-oxo-C12-homoserine lactone (3OC12HSL) and RhIR-regulated autoinducer N-butyryl-L-homoserine lactone (C4HSL).

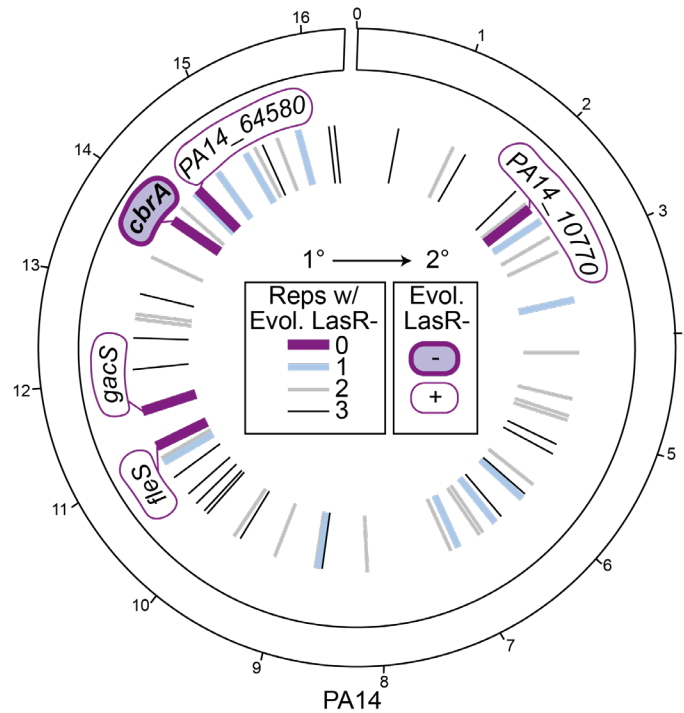

**Supplemental Figure 3. Screen reveals specific requirement of CbrA, and not other sensor kinases encoded in the PA14 genome for LasR- strain selection.** Circos plot of the PA14 genome, with the genomic location of the genes deleted to create the kinase mutant collection indicated by lines in the inner circle (and noted in Table S2); outer ticks indicate 4 x 10<sup>5</sup> bp genome increments. The primary screen (1°) was performed in a 96-well plate format in LB with each strain in triplicate. Deletion backgrounds that had zero, one, two, or three replicates containing LasR- phenotypes at the time of plating (i.e. when all wild-type controls had > 50% colonies with LasR- phenotypes) are represented as lines colored purple, blue, or grey respectively with decreasing line thickness. Deletion mutants that were found to have zero colonies with LasR- phenotypes (thick dark purple lines, gene names indicated) were secondarily screened in 5 mL LB evolution assays (Fig. S4A); only  $\Delta cbrA$  (filled in purple) was negative (-) for LasR- phenotypes in the secondary screen (2°).

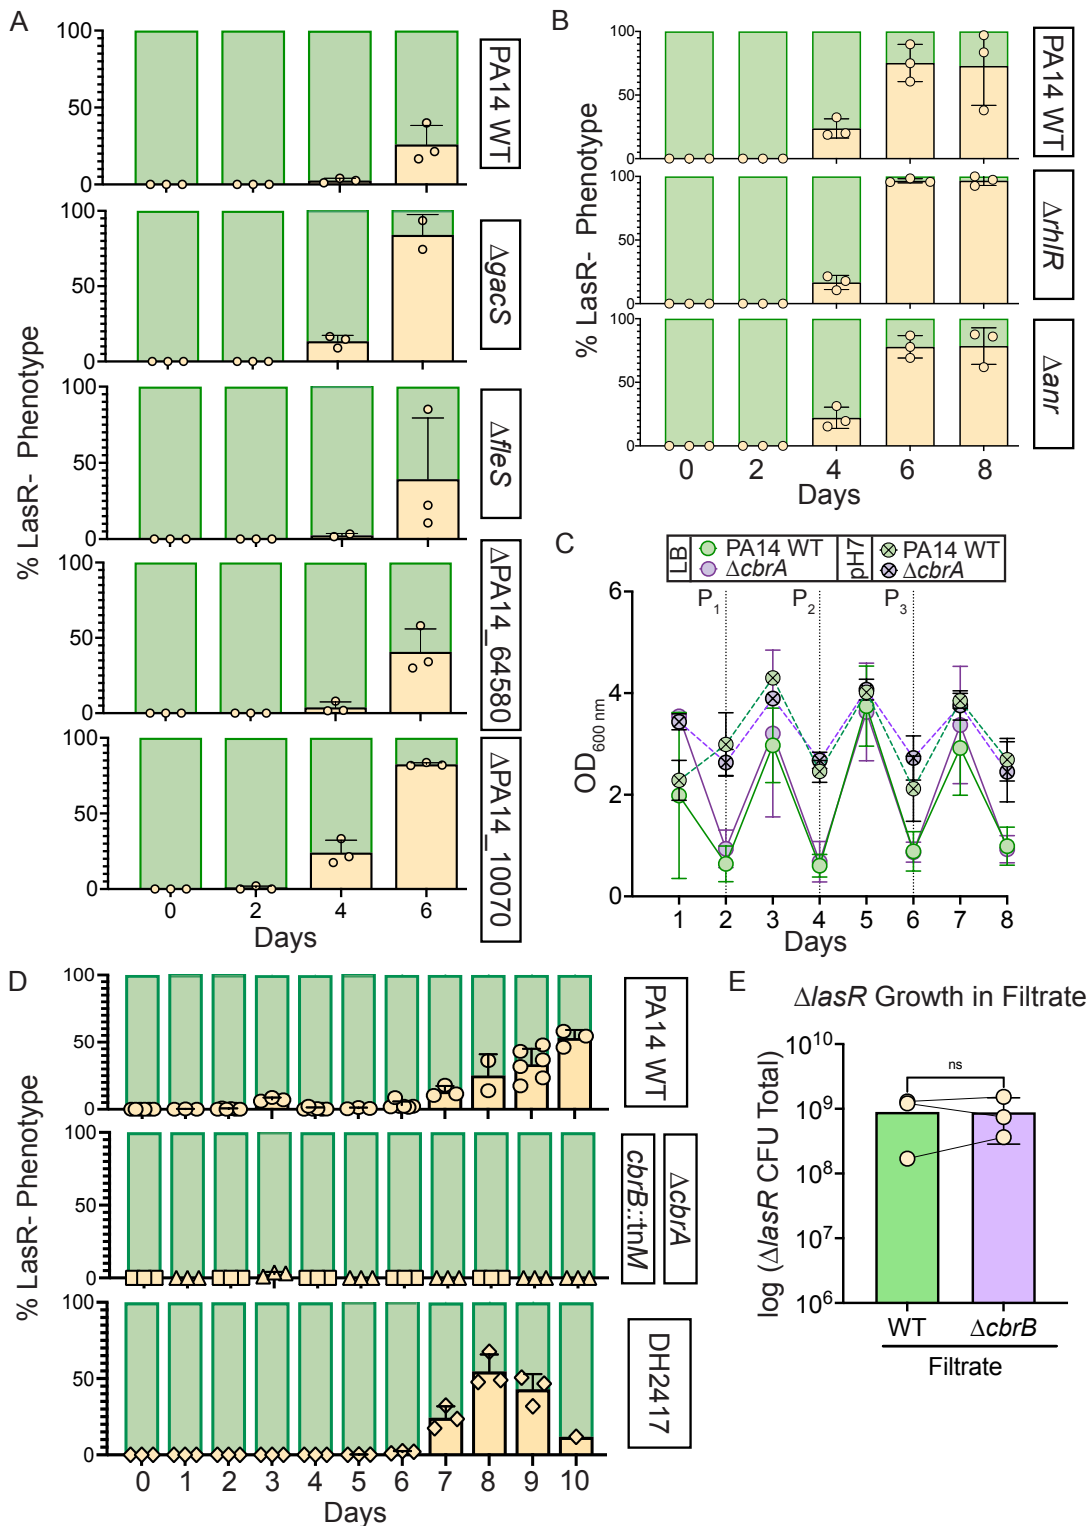

**Supplementary Figure 4. LasR- strains evolve in all tested strain backgrounds except for those deficient in *cbrAB*, and this is independent of cellular density, lysis, and filtrate toxicity.** A. Kinase deletion mutant backgrounds that did not evolve LasR- phenotypes in any replicate of a 96-well evolution (Fig. S3) were secondarily screened for the appearance of LasR- colonies in 5 mL cultures. The colony phenotypes were quantified over time with percentage of LasR- phenotypes indicated (beige). B. The percent of colonies with LasR- phenotypes observed for LB evolution experiments initiated with strains PA14  $\Delta rhIR$  or  $\Delta anr$  relative to wild type. C. Optical density for PA14 wild type (WT, green) or  $\Delta cbrA$  (purple) cultures over course of evolution in LB (circles,  $n \geq 9$ ) or LB buffered to pH 7 with HEPES (circle with "x",  $n \geq 3$ ). Points represent the average and error bars, standard deviation. Statistical significance between WT and  $\Delta cbrA$  determined by two-way ANOVA with Šidák's multiple comparisons test for LB and buffered LB datasets separately. For LB: Day 1,  $p < 0.0001$ . For buffered LB: Day 1,  $p = 0.023$  and Day 6,  $p < 0.009$ . All other comparisons are non-significant. D. Percentage of colonies with LasR- phenotypes over the course of evolution in buffered LB for PA14 WT (circles),  $\Delta cbrA$  (triangles) or  $cbrB::tnM$  (squares), or DH2417 LasR+ clinical isolate (diamonds) ( $n \geq 3$ ). E. Density (i.e. total colony forming unit counts) of PA14  $\Delta lasR$  after 24 h of growth in filtrate from saturated PA14 wild type or  $\Delta cbrB$  cultures. ns, not significant as determined by Student's t-test.

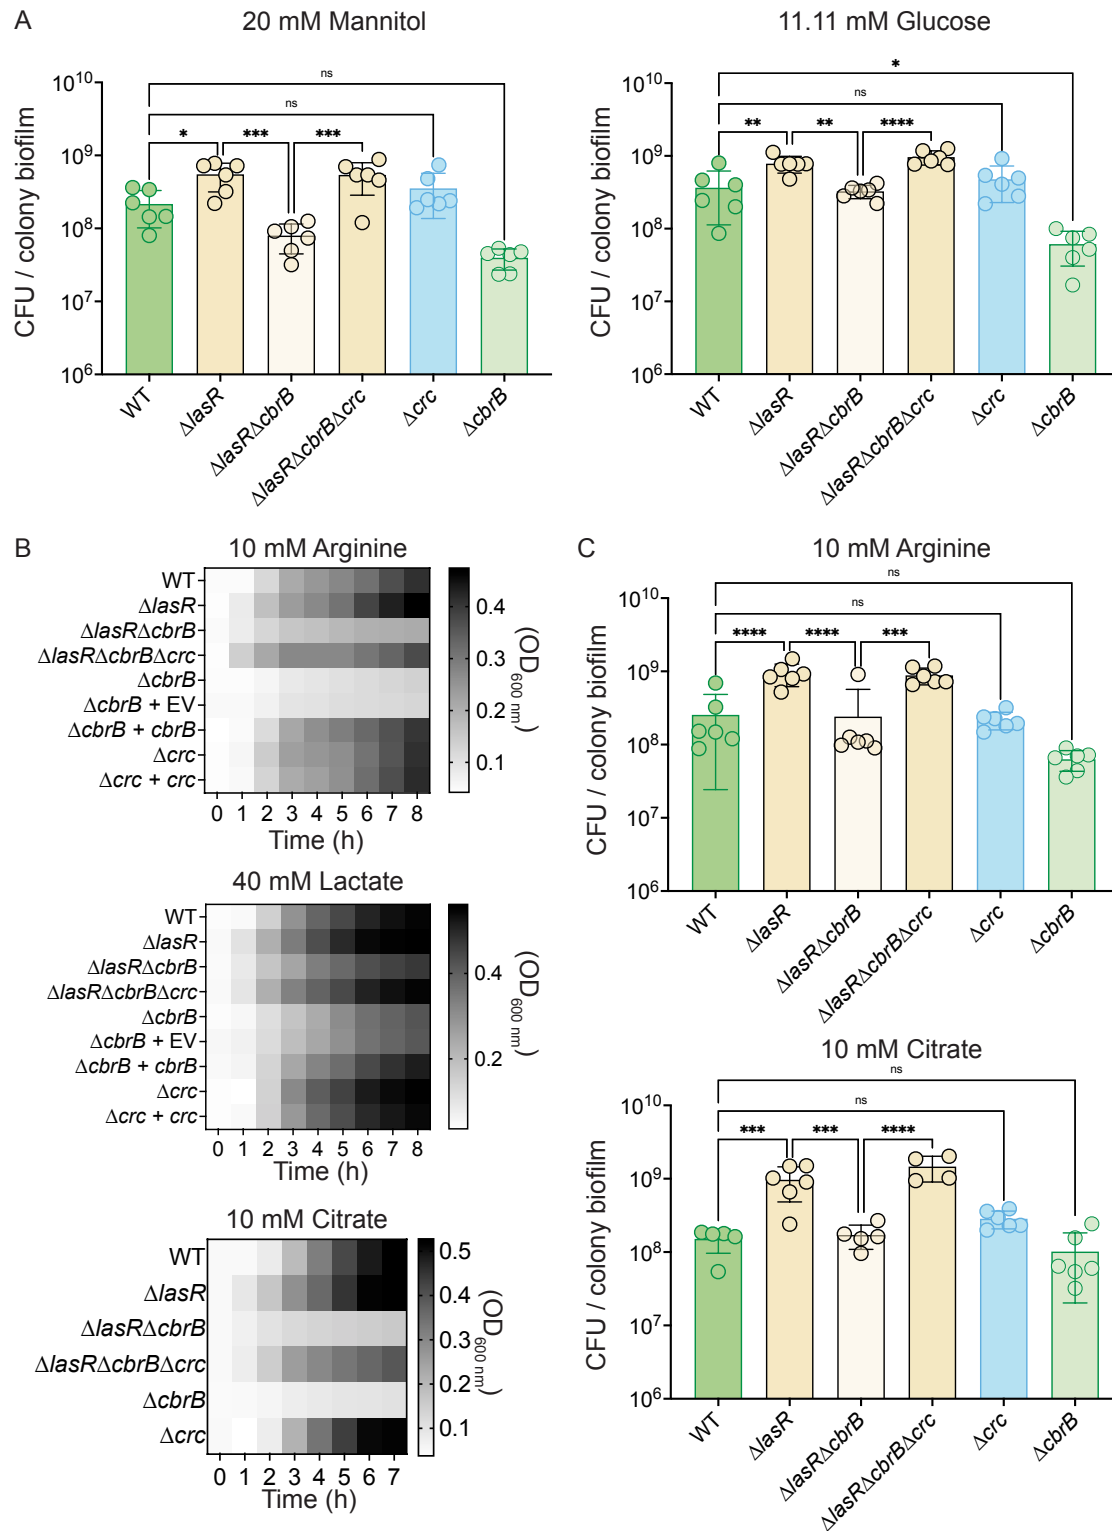

**Supplemental Figure 5.  $\Delta lasR$  strains have CbrB-dependent growth advantages that can be restored via loss of *crc*.** A. Colony biofilm CFUs were enumerated for strains PA14 WT,  $\Delta lasR$ ,  $\Delta lasR\Delta cbrB$ ,  $\Delta lasR\Delta cbrB\Delta crc$ ,  $\Delta crc$ , and  $\Delta cbrB$  after 16 h on M63 minimal medium containing 20 mM mannitol or 0.2% glucose, which have been well studied in the context of carbon catabolite repression (i.e. the CbrAB pathway). B. Heatmap representation of planktonic growth on different carbon sources: 10 mM arginine, 40 mM lactic acid, and 10 mM citrate. Heatmaps show the average growth ( $OD_{600\text{ nm}}$ ) across three independent experiments with three replicates per day. C. Colony counts of resuspended colony biofilms grown on agar plates containing 10 mM Arginine or 10 mM citrate as sole carbon sources. Bottom of y-axis set to starting inoculum density. P-values: ns, not significant; \*,  $p < 0.05$ ; \*\*,  $p < 0.01$ ; \*\*\*,  $p < 0.0007$ ; \*\*\*\*,  $p < 0.0001$  as determined by ordinary one-way ANOVA with Šídák's multiple comparisons test. Each data point of colony count (CFU) was collected on a separate day ( $n = 6$ ).

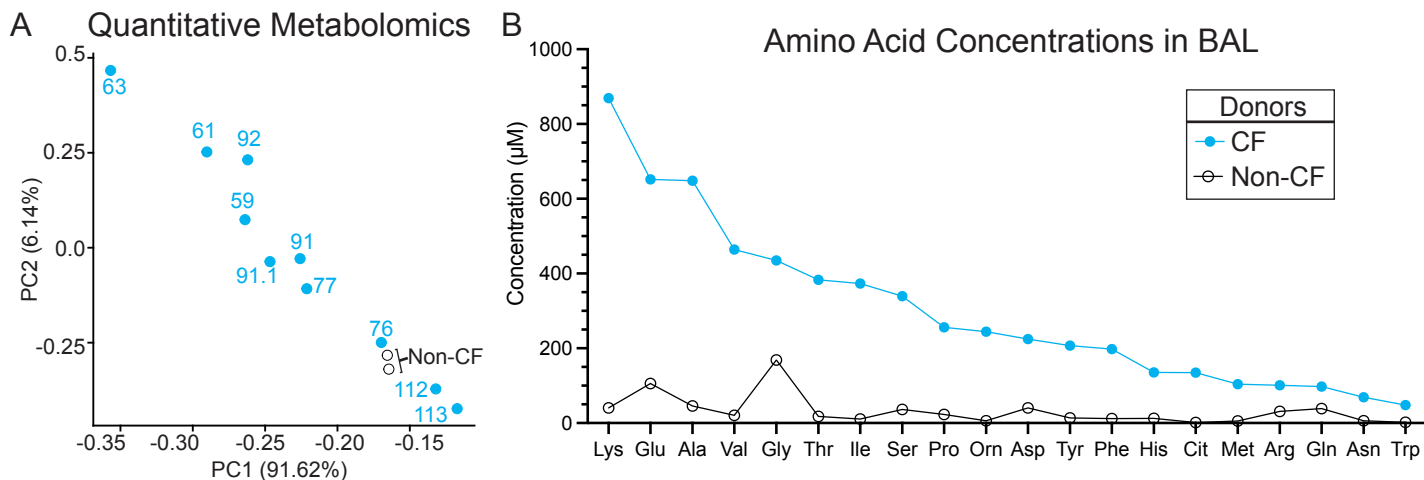

**Supplemental Figure 6. Quantitative amino acid analysis.** A. The first two components (PC1 and PC2) of a principal component analysis of log normalized amino acid concentrations measured in bronchoalveolar lavage (BAL) fluid collected from cystic fibrosis (CF, blue filled circles) and non-cystic fibrosis (Non-CF, black open circles) donors by the Biocrates AbsoluteIDQ p180 Kit explain 91.62% and 6.14% of the variation in the data, respectively. As with the relative metabolite counts measured by LC/MS used in Fig. 4A, PC1 of the amino concentrations measured by the Biocrates AbsoluteIDQ p180 Kit separates BAL samples by the respective percent forced expiratory volume in 1 sec (%FEV<sub>1</sub>) (overlaid text). B. Average amino acid concentrations ( $\mu\text{M}$ ) measured from BAL samples collected from cystic fibrosis (CF, blue) and non-cystic fibrosis (Non-CF, black) donors. See Supplemental Table 5 for data by sample.
